# Supplementary material for: Journal editors’ perspectives on the roles and tasks of peer reviewers in biomedical journals: a qualitative study
Source: PubMed Central journal article supplement (PMC6886905; doi:10.1136/bmjopen-2019-033421), 2019-11-24
Supplement: bmjopen-2019-033421.draft_revisions.pdf [file bmjopen-2019-033421.draft_revisions.pdf]

# BMJ Open

BMJ Open is committed to open peer review. As part of this commitment we make the peer review history of every article we publish publicly available.

When an article is published we post the peer reviewers' comments and the authors' responses online. We also post the versions of the paper that were used during peer review. These are the versions that the peer review comments apply to.

The versions of the paper that follow are the versions that were submitted during the peer review process. They are not the versions of record or the final published versions. They should not be cited or distributed as the published version of this manuscript.

BMJ Open is an open access journal and the full, final, typeset and author-corrected version of record of the manuscript is available on our site with no access controls, subscription charges or pay-per-view fees (<http://bmjopen.bmj.com>).

If you have any questions on BMJ Open's open peer review process please email [info.bmjopen@bmj.com](mailto:info.bmjopen@bmj.com)

# BMJ Open

## Editors' perspectives on the roles and tasks of peer reviewers in biomedical journals: A qualitative study

|                               |                                                                                                                                                                                                                                                                                                                                                                                                       |
|-------------------------------|-------------------------------------------------------------------------------------------------------------------------------------------------------------------------------------------------------------------------------------------------------------------------------------------------------------------------------------------------------------------------------------------------------|
| Journal:                      | <i>BMJ Open</i>                                                                                                                                                                                                                                                                                                                                                                                       |
| Manuscript ID                 | bmjopen-2019-033421                                                                                                                                                                                                                                                                                                                                                                                   |
| Article Type:                 | Research                                                                                                                                                                                                                                                                                                                                                                                              |
| Date Submitted by the Author: | 04-Aug-2019                                                                                                                                                                                                                                                                                                                                                                                           |
| Complete List of Authors:     | Glonti, Ketevan; Sveuciliste u Splitu, Department of Psychology, School of Humanities and Social Sciences; Université de Paris, CRESS, INSERM, INRA<br>Boutron, Isabelle; Université de Paris, CRESS, INSERM, INRA<br>Moher, David; Ottawa Hospital Research Institute, Ottawa Methods Centre<br>Hren, Darko; University of Split, Department of Psychology, School of Humanities and Social Sciences |
| Keywords:                     | Peer review, Biomedical publishing, Scientific journal publishing, QUALITATIVE RESEARCH, Stakeholder consultation                                                                                                                                                                                                                                                                                     |
|                               |                                                                                                                                                                                                                                                                                                                                                                                                       |

SCHOLARONE™  
Manuscripts

# Editors' perspectives on the roles and tasks of peer reviewers in biomedical journals: A qualitative study

Ketevan Glonti<sup>1,2</sup>, Isabelle Boutron<sup>2</sup>, David Moher<sup>3</sup>, Darko Hren<sup>1</sup>

<sup>1</sup> University of Split, Department of Psychology, School of Humanities and Social Sciences, Split, Croatia. [kglonti@unist.hr](mailto:kglonti@unist.hr), [dhren@ffst.hr](mailto:dhren@ffst.hr)

<sup>2</sup> Université de Paris, CRESS, INSERM, INRA, F-75004 Paris, France. [isabelle.boutron@aphp.fr](mailto:isabelle.boutron@aphp.fr)

<sup>3</sup> Center for Journalology, Clinical Epidemiology Program, Ottawa Hospital Research Institute, Ottawa, Canada. [dmoher@ohri.ca](mailto:dmoher@ohri.ca)

**Corresponding author:** Ketevan Glonti, Poljička 35, 21000 Split, Croatia, [kglonti@unist.hr](mailto:kglonti@unist.hr)  
**Tel:** +385 976324635

## Abstract

**Objective** Peer reviewers of biomedical journals are expected to perform a large number of roles and tasks, some of which are seemingly contradictory or demonstrate incongruities between the respective positions of peer reviewers and journal editors. The aim of this study was to explore the perspectives of journal editors regarding the roles and tasks of peer reviewers in order to advance understanding of the findings from a previously conducted scoping review and to facilitate knowledge translation for improved communication and better outcomes in the peer review process.

**Design** Qualitative study

**Setting** Worldwide

**Participants** 56 journal editors from biomedical journals most of whom, were Editor-in-Chiefs (n=39), male (n=40) and worked part-time (n=50) at journals from 22 different publishers.

**Methods** Semi-structured interviews with 56 journal editors were conducted. Recruitment was based on purposive maximum variation sampling. Data were analysed thematically following the methodology by Braun and Clarke.

**Results** Journal editors' understanding of the roles and partly of tasks of peer reviewers are profoundly shaped by each journal's unique context and characteristics including financial and human resources and journal reputation or prestige. There was a broad agreement among editors on expected technical tasks of peer reviewers related to scientific aspects but show different expectations in the level of depth. We also found that most editors support the perspective that authorship experience is key to high-quality reviews while formal training in peer reviewing is not.

**Conclusions** These editors' accounts reveal issues of a social nature within the peer review process related to missed opportunities for journal editors to engage with peer reviewers to clarify the expected roles and tasks. From this, we conclude that the social dimensions of biomedical manuscript review should be made more explicit and acknowledged as an integral part of the peer review process that needs to be communicated through appropriate channels to authors and peer reviewers, and integrated into existing and future interventions aimed at improving peer review.

1  
2  
3 **Keywords:** Peer review; Biomedical publishing; Scientific journal publishing; Qualitative research;  
4 Stakeholder consultation  
5

## 6 **Strengths and limitations of this study**

- 7 - This study is one of few qualitative studies that explore biomedical journal editors' views  
8 regarding the roles and tasks of peer reviewers
- 9 - The participants were diverse in terms of characteristics related to the journals
- 10 - The majority of the participants were Editor-in-Chiefs, which may limit the generalisability of  
11 the results  
12  
13  
14  
15  
16

## 17 **Introduction**

18 Peer reviewers of biomedical journals are key stakeholders in the editorial ecosystem, helping authors  
19 to improve manuscripts and providing advice to scientific editors on their decision regarding the  
20 acceptability of publishing papers. Despite their importance for scientific publishing, fundamental  
21 principles such as the roles, tasks and core competencies of peer reviewers – including a minimum  
22 standard of knowledge, skills, and characteristics that are needed to effectively deliver high quality  
23 reviewer reports – are neither well defined, agreed upon, or formally established (1). While core  
24 competencies have been to some degree established for journal editors (2) thus far this is not the case  
25 for peer reviewers. In a recent scoping review (2019), we showed that there is a large number of roles  
26 and tasks that peer reviewers of biomedical journals are expected to carry out. In this review, we  
27 identified 76 'roles' referring to the overarching nature of peer reviewers' function and 73 'tasks'  
28 referring more specifically to actions that fulfil these roles. Some of the roles and tasks seemed to  
29 contradict each other, and apparent incongruities between the position of the peer reviewer and the  
30 position of the journal editor were highlighted (3).

31 Given that peer review is a complex social process (4), qualitative methods may lead to a deeper  
32 examination of the complexities of these processes compared to quantitative approaches. Therefore,  
33 we decided to conduct a stakeholder consultation through interviews with biomedical journal editors  
34 who lead the editorial process.

35 Our aim was to examine editors' experiences of interacting with peer reviewers and to characterise  
36 their perspectives, expectations and understanding of the roles and tasks of peer reviewers.  
37  
38

## 39 **Methods**

### 40 **Study design**

41 We conducted semi-structured interviews with biomedical journal editors. The design of the study and  
42 reporting of study results were informed by relevant guidance for reporting qualitative research (5).  
43 Key methodological components are presented below; a detailed description of the study  
44 methodology is available elsewhere (6).  
45  
46  
47  
48  
49  
50  
51  
52  
53  
54

### 55 **Patient and Public Involvement**

56 It was not appropriate or possible to involve patients or the public in the design, or conduct, or  
57 reporting, or dissemination of our research.  
58  
59  
60

## Sampling and recruitment

We used purposive maximum variation sampling (7) to obtain as much diversity in the demographic and journal characteristics of study participants as possible. Interviewees were recruited from multiple sources, including the lead author's professional network within the Methods in Research on Research (MiRoR) project (8); from two publishers, namely, BioMed Central (BMC) and British Medical Journal (BMJ) publishing group; and attendees of the Eighth International Congress on Peer Review and Scientific Publication (9). In addition, interviewees were asked to recommend other editors who would potentially be interested in contributing to this study.

Since sample size is irreversibly linked to saturation, which in turn can only be operationalized during data collection (10), our approach to data collection and analysis was iterative. Thus, recruitment continued until saturation – conceptualized as the point at which no new codes and themes were identified from the data – was achieved.

## Data collection

All interviews were conducted between October 2017 and February 2018 by the lead author (KG). Interviews were conducted either face-to-face or by telephone to accommodate for the geographical diversity and availability of study participants. A topic guide (Additional file 1) was used during the semi-structured interviews. The guide was initially informed by the outcomes of the scoping review (1), and was piloted and further refined over the course of the study, particularly after the first four interviews.

KG was a PhD student at the time of the interviews. She has previously experienced the peer review process in biomedical journals as an author and peer reviewer, and had undergone training in conducting qualitative interviews prior to data collection. She was supervised by DH, who has extensive experience of the peer review process in biomedical journals as an author, peer reviewer and journal editor.

## Analysis

Interviews were transcribed verbatim and fieldnotes were written up after every interview. All documents were then imported into NVivo V.12 and subjected to thematic analysis as described by Braun and Clarke (11) and outlined in the protocol (6). In summary, a preliminary codebook was generated by two researchers (KG and DH) independently from a subset of six interviews (12) using both, deductive codes from topics in the interview guide and inductive content-driven codes. The remaining 50 interviews were coded by the lead researcher (KG), supervised by DH through regular meetings. In line with the iterative process of data collection and analysis, interviews were analysed in the order in which they were conducted. To assess saturation, the lead researcher documented the process of code development, updating the codebook after analysing each transcript. Saturation was achieved after 56 interviews.

To establish trustworthiness in this research, the step-by-step approach proposed by Nowell et al., which provides a detailed description of how to conduct a trustworthy thematic analysis, was followed (13). This approach used criteria for trustworthiness in qualitative research proposed by Lincoln and Guba (14) and shows how these can be achieved throughout the six phases of thematic analysis. The methodological techniques that we undertook to ensure a trustworthy analysis throughout our study are presented in Additional file 2.

## Results

A total of 56 biomedical journal editors were interviewed (Table 1). Of these, the majority were male Editor-in-Chiefs who were based in 21 different countries. Most editors worked part-time at their respective journals, which were mainly specialty journals. Most journals employed a single-blind review process. There was a balance of journals with and without an impact factor. Most interviewees were editors of journals that are published through commercial publishers.

**Table 1** Sample characteristics

| Demographic characteristics             |                                                                                                                                  |
|-----------------------------------------|----------------------------------------------------------------------------------------------------------------------------------|
| <b>Sex</b>                              | Female (n=16), Male (n=40)                                                                                                       |
| <b>Position</b>                         | Junior Editor (n= 1), Senior/Associate Editor (n=11), Co-Editor-in-Chief (n=4), Editor-in-Chief (n=39), Editorial Director (n=1) |
| <b>Commitment</b>                       | Part-time (n=50), Full-time (n=6)                                                                                                |
| <b>Geographic location</b>              | Asia (n=2), Africa (n=1), North America (n=19), South America (n=3), Europe (n=28), Oceania (n=3)                                |
| Journal characteristics                 |                                                                                                                                  |
| <b>Journal specialty</b>                | General medicine and Mega journals* (n=13), Specialty (n=43)                                                                     |
| <b>Impact factor</b>                    | Impact factor (n=27), No impact factor (n=29)                                                                                    |
| <b>Peer review model</b>                | Single-blind (n= 38), Double-blind (n=7), Triple-blind (n=1), Open peer review (n=9), Post-publication (n=1)                     |
| <b>Open access, Subscription, Mixed</b> | Open access (n=35), Subscription (n=4), Mixed (n=17)                                                                             |
| <b>Publishers</b>                       | Academic (n=9), Commercial (n=34), Mixed model** (n=13)                                                                          |

\*A peer-reviewed academic open access journal designed to be much larger than a traditional journal by exercising low selectivity among accepted articles.

\*\* Refers to journals that are either co-owned by medical societies and commercial publishers, or owned entirely by medical societies but operated through a commercial publisher

## Roles of peer reviewers

Journal editors outlined a variety of roles, which coalesced around five domains. Peer reviewers should be: (1) Proficient experts in their field qualified to peer review; (2) Dutiful towards scientific community vs volunteers who deserve recognition; (3) Professionals; (4) Advisors to the editor; (5) Roles that peer reviewers should not perform

### Peer reviewers should be 'Proficient experts in their field qualified to peer review'

There was agreement among editors that peer reviewers are experts in their field when they: (1) have expertise and demonstrate high-level knowledge in their subject area; (2) are up to date with existing

1  
2  
3 evidence and practice guidelines; and (3) have experience of publishing their own research. However,  
4 there was substantial disagreement on how these criteria are defined and understood, and how  
5 'expertise' is operationalized.  
6  
7

8 One common narrative was that qualified peer reviewers are "experienced authors" who have a strong  
9 reputation and publication record in "high-impact journals". Concurrently, a number of editors linked  
10 the quality of the peer review report with the reviewers' writing and analytical skills, which they  
11 believed are gained through extensive authorship in their field. In their view, authorship hones both  
12 writing and reviewing ability, since authors are theoretically able to learn from review reports on their  
13 own submitted manuscripts:  
14

15  
16 *"You learn by doing and if you have published let's say 200 articles then normally you are*  
17 *also a good reviewer... and if you are a bad author of manuscripts then you are a bad*  
18 *reviewer. And your opinion leaders are the sought after reviewers because they know the*  
19 *field and can write well and can also analyse a manuscript from another author quite*  
20 *well."* (Editor-in-Chief, specialty journal).  
21

22 Interviewees also indicated that they had a preference for seasoned authors and opinion leaders in  
23 the field over junior researchers. Here, their main concern was about fulfilling authors' expectations  
24 of an objective peer review by recruiting an expert to review their manuscript:  
25

26  
27 *"Well first of all I think our reviewers ... are seasoned, they have to be experts, I mean*  
28 *otherwise why are they reviewing? That is not fair to the author."* (Co-editor-in-Chief,  
29 specialty journal)  
30

31 However, several editors commented that the actual level of expertise needed to deliver a high quality  
32 review report does not necessarily depend on publication record and seniority level. Some editors  
33 considered reviewing to require a different type of skillset that is not necessarily developed through  
34 writing or present by default. Other key factors drive review quality, such as "dedication of sufficient  
35 time" and "hands on experience with the methods used". This is often the case with junior  
36 researchers, who go through an active learning experience of applying methods for their own research  
37 and receiving feedback on their work. Less experienced researchers' greater motivation to peer review  
38 was also mentioned as a major driver of high-quality reviewer reports. For these reviewers, receiving  
39 the invitation to review is in itself a confirmation of growing personal reputation and recognition by  
40 the journal, and by the broader scientific community. At the same time, their supposed lack of self-  
41 confidence due to their current low career status/standing within the scientific field could also drive  
42 the delivery of high-quality reviewer reports, in a desire to establish and maintain their status within  
43 the scientific community:  
44  
45

46  
47 *"I will say that junior faculty and post doctorate fellows often write the best reviews*  
48 *because they tend to be insecure and tend to over-compensate and to be very careful in*  
49 *doing a good job."* (Editor-in-Chief, specialty journal).  
50

51 In the same vein, a number of editors from non-high ranking journals commented that senior  
52 reviewers' increasing scientific status and "self-regard" might lead to declining review report quality,  
53 most commonly demonstrated by the "lack of detailed comments" or "two-line" review reports that  
54 did not aim to help "to improve a manuscript", but only to judge publication potential. That being said,  
55 "experienced" peer reviewers were still highly sought after by all interviewees. Since they typically  
56 receive a high volume of reviewer requests, journal editors suspect that they prioritize their reviewing  
57 time in favour of highly ranked journals, a behaviour that multiple journal editors unapologetically  
58 reported practicing themselves when asked to perform a peer review. Although the least experienced  
59  
60

1  
2  
3 reviewers are generally more available, most editors feel that they lack the degree of experience  
4 required to conduct a good peer review and “focus excessively on technical details”, instead of the  
5 “bigger picture” that more experienced reviewers are able to provide.  
6

7  
8 Regardless of preference for the type of peer reviewer, the vast majority of interviewees – except for  
9 those editors working for high-ranking journals - acknowledged that it is hard to solicit peer reviewers  
10 in general, particularly experienced ones:

11  
12 *“And one of the things that we face is that we have on one side younger investigators,*  
13 *willing to do the job. Sometimes they lack you know, the view and then you will have the*  
14 *very established scientist who in most cases do refuse to make reviews. And so we have to*  
15 *balance out ...these two extremes.”* (Editor-in-Chief, specialty journal).  
16

17  
18 Lastly, whilst peer reviewers were expected to fulfil the above outlined criteria to some degree,  
19 interviewees did not consider the completion of a training or a course on peer reviewing as a  
20 prerequisite or necessary qualification to become a peer reviewer. All interviewees stated that they  
21 learnt to peer review manuscripts “by just doing it”, without having had previous training, and  
22 suggested that this was also the case for the majority of the peer reviewers in biomedical journals.  
23 Editors explained how one way of honing reviewing skills is through indirect feedback and comparisons  
24 with fellow reviewers’ reports (i.e. operationalized through comparing their own feedback with that  
25 of other peer reviewers for the same manuscript); and through the final decision taken by the Editor-  
26 in-Chief on the fate of the manuscript.  
27

28  
29 *“We also tried to train our reviewers in an indirect way that is when a decision was*  
30 *completed and when we send the decision letter to the author we usually carbon copy the*  
31 *decision along with the comments of all the reviewers to all the reviewers so that every*  
32 *reviewer can see and compare their comments, their own comments with the comments*  
33 *of other reviewers and that would be a form of training for them.”* (Editor-in-Chief,  
34 specialty journal).  
35

36  
37 There was a division of opinions on the usefulness of courses that aim to teach peer reviewing skills.  
38 While several editors were receptive to the idea, others felt that they could only be useful to less  
39 experienced researchers because they can only teach about the technicalities of the process and  
40 cannot replace experience gained over time:  
41

42  
43 *“I learnt on the field. First, as an author and then, you know, when I become more*  
44 *established a scientist, as a reviewer it is a long process, and difficult process... [with]*  
45 *courses, you can learn the technicalities of the process but you know experience is very*  
46 *relevant... courses do not help established scientists, they may help young scientists but*  
47 *the courses won't give them experience in actually in the field.”* (Editor-in-Chief, specialty  
48 journal).  
49

### 50 51 **Peer reviewers should be ‘Dutiful towards scientific community vs. volunteers who deserve** 52 **recognition’**

53  
54 The majority of interviewees repeatedly expressed their gratitude towards peer reviewers, whom they  
55 most commonly framed as “volunteers” who perform peer review out of “altruistic motives”. Being  
56 occasional reviewers themselves, editors were well aware of the many competing duties of peer  
57 reviewers in the biomedical field - including research, teaching and/or clinical responsibilities –  
58 between which reviewing has to be squeezed in. Many interviewees emphasised that reviewing is  
59 “time consuming” and repeatedly described it as an “unpaid” and largely “unrecognised” role:  
60



1  
2  
3 *“...Most of the work that is done on journals is uncompensated, and ... you are already*  
4 *dealing with people who are very busy people in their professional lives, and so you are*  
5 *really asking them to do things at nights and weekends for which they get really very little*  
6 *recognition. And very little compensation if any.”* (Editor-in-Chief, specialty journal).  
7

8  
9 Given that the majority of editors face difficulties finding peer reviewers, several considered peer  
10 reviewers to be a “precious resource” that needs to be treated with “care”. Interviewees reported  
11 doing so through: (1) careful screening of submissions to ensure that only sufficiently good-quality  
12 manuscripts are forwarded to peer reviewers (2) not overburdening good peer reviewers with too  
13 many invitations; and (3) provision of recognition and rewards. Several recognition and reward  
14 schemes were mentioned, which can be broadly divided into two categories: (1) Financial rewards  
15 (free access to journal/publication discount) and small tokens of appreciation (e.g. mugs, books); and  
16 (2) Rewards aimed at boosting career progress through official professional development (e.g.  
17 Continuing Medical Education (CME) points; official letters for Continuing Professional Development  
18 (CPD); and through journal rewards aimed at enhancing peer reviewers’ visibility, reputation and  
19 credibility within the scientific community (e.g. being invited to become editors and/or editorial board  
20 members, names published on journal website, invitations to social events).  
21  
22

23  
24 In contrast to the more common perception of reviewers as “volunteers”, a small number of editors  
25 commented that peer reviewers should consider the act of peer reviewing to be a “responsibility”,  
26 “duty” and “obligation to their field” and to the scientific community in general. In their view, the  
27 entire process relies on - and only works because of - the principle of reciprocity and researchers  
28 perpetuating the development of the own research community. In their view, reciprocity should be a  
29 strong motivational drive for peer reviewers:  
30

31 *“Those of us who have a track record in publication get solicited for doing an awful lot of*  
32 *reviewing and you have got to fit that in around your other time and you are doing it*  
33 *because the process is important and you want your next paper to get properly reviewed*  
34 *so you want to peer review the paper that you have been sent.”* (Interim Editor-in-Chief,  
35 specialty journal).  
36  
37

38  
39 A few editors were more critical of the rationale for reviewing “for free”, suggesting that the concept  
40 of duty in peer reviewing had originally been coined and continued to be fostered by publishers for  
41 profit-making purposes, and is now dated:  
42

43 *“I mean they... they say this is your duty, you know it is your duty as a scientist to, you*  
44 *know, do these things ... and give back, but ... really the journals ... certainly are profiting*  
45 *now the authors are paying pretty good page charges, the reviewers aren’t getting paid,*  
46 *and you know this could be an issue.”* (Editor-in-Chief, specialty journal).  
47  
48

### 49 **Peer reviewers should be ‘Professionals’**

50 Of the nine domains identified regarding the role of peer reviewers there was general agreement on  
51 the need for reviewers to be: (1) Unbiased and ethical professionals; (2) Reliable professionals; (3)  
52 Skilled critics  
53

54 Editors outlined three aspects related to their expectation that peer reviewers should be ‘unbiased  
55 and ethical professionals’ consistent with ‘scientific ideals’. These were: (1) being “fair” and “objective”  
56 (i.e. peer reviewers are expected to evaluate and judge manuscripts in a fair and objective manner);  
57 (2) “maintain confidentiality” (i.e. peer reviewers are expected keep manuscript content confidential  
58 avoiding disclosure to others); and (3) “declare/avoid potential or actual conflict of interest”. Editors  
59  
60

1  
2  
3 emphasized the importance of the latter most frequently. Some editors explained that conflict of  
4 interest could potentially contribute to increased review quality but stressed that transparency is key.  
5 They emphasized their own position as “decision makers” within the peer review process to assess and  
6 decide whether the reported conflict of interest is prohibiting a fair and objective assessment.  
7

8  
9 Editors also unanimously agreed that peer reviewers should be ‘reliable professionals’ who should  
10 “respond promptly to peer reviewer requests”. They should either accept or decline, but not “ignore  
11 the invitation to review”, which is the more common frustrating practice reported by interviewees  
12 from non-high ranking journals. The common understanding among all editors was that a good peer  
13 reviewer report takes a substantial amount of time to be written, something that peer reviewers  
14 should be aware of prior to accepting. They should be willing to devote sufficient time and attention  
15 to the evaluation of manuscripts yet deliver the reviewer report within the agreed timeline out of  
16 “respect” and “fairness” to authors, to the journal and the publisher.  
17  
18

19  
20 Lastly, the majority of interviewees considered helping authors to “improve their manuscript” to be  
21 the primary purpose of the peer reviewer, not to suggest a rejection or to “filter it out”. Therefore, the  
22 need for reviewers to be ‘skilled critics’ was explicitly and implicitly voiced throughout the interviews.  
23 As part of the improvement role, it was expected that peer reviewers provide “constructive criticism  
24 embodying specific and addressable comments”. Peer reviewers were also expected to be “thorough  
25 and detailed” and to “systematically address every aspect of the manuscript”. Another aspect  
26 emphasised by interviewees was the need for an “evidence-based review”, where peer reviewers’  
27 statements should be “supported by references” that aid the author and guide the editor.  
28

29 Editors expected peer reviewers to be ‘respectful communicators’. They outlined basic principles of  
30 courtesy such as “respect for the work of the authors”. Peer reviewers were expected to provide  
31 comments that “serve a scientific purpose” whilst keeping in mind that they are criticising the  
32 manuscript, not the authors. Appropriate communication was deemed to be crucial. Based on editors’  
33 accounts that peer reviewers should be “kind” and offer “positive” comments to nurture and  
34 “encourage” authors to improve their work, it became evident that peer reviewing should go beyond  
35 the mere technical assessment of manuscripts, and thus has also a supportive role:  
36  
37

38  
39 *“I often think the peer reviewers are incredibly negative, and they rarely have anything*  
40 *positive to say. And I tend to feel, you know if somebody was reviewing my manuscript I*  
41 *would want them to try to say at least one tiny little positive thing about what I have*  
42 *done.”* (Editor-in-Chief, specialty journal)  
43  
44

#### 45 **Peer reviewers should be ‘Advisors to the editor’**

46 Editors were explicit in their attribution of a primarily “advisory role” to peer reviewers. Our  
47 interviewees perceived and stressed their own role as the “ultimate decision makers” who take  
48 decisions based on the sum of the factors outlined above. They have the authority to “override peer  
49 reviewers recommendations” and “ignore their opinion” if necessary thereby directly or indirectly  
50 exerting influence on authors to modify their manuscripts:  
51

52  
53 *“...the peer reviewer is really playing an advisory role to the editors...it’s only the editors*  
54 *that make a decision on whether to accept or not and how they want the paper to be*  
55 *written.”* (Editor-in-Chief, specialty journal).  
56

57 Editors made it clear that decision-making within the editorial process is shaped and influenced by the  
58 interplay of a complex web of factors, including: (1) the editors’ own expert knowledge and ability to  
59 assess different aspects of manuscripts; (2) peer reviewer reports; (3) authors’ replies; (4) discussions  
60

1  
2  
3 between editors and editorial board members during manuscript meetings where manuscripts  
4 considered for publication are discussed; (5) the number and type of submissions received; (6) the  
5 strategic approach of the journal; (7) consideration of readership, and (8) subjects related to  
6 publishers. Thus, while peer reviewer reports play a key part, they are not the only element within the  
7 equation. While scientific quality and value of submitted manuscripts were at the foreground,  
8 interviewees were largely open about the influence of other non-scientific factors that play into their  
9 decision making process. Nevertheless, the peer reviewer report was consistently regarded as a key  
10 pillar supporting publication decisions, including peer reviewers' advisory role of providing the editor  
11 with a "recommendation on the fate of the manuscript". With few exceptions, most editors reported  
12 that their journal submission systems ask peer reviewers to indicate whether the manuscript should  
13 be accepted (with major/minor revisions) or rejected:  
14  
15

16  
17 *"...the most important thing for me is actually at the end, the advice to reject the paper or*  
18 *have it revised."* (Editor-in-Chief, specialty journal).  
19

20 Most editors were open about the substantial influence of peer reviewer recommendations on their  
21 decision-making. This was rationalized in a variety of ways, which often co-exist. Editors partly deferred  
22 their decision to peer reviewers when they felt uncertain about their own knowledge and ability to  
23 assess the manuscript adequately, referring to the "trust" they extend towards experts in the field to  
24 help in decision-making. Ticking the recommendation box was also useful to justify editorial decisions  
25 to authors when the peer reviewer report did not convey a clear direction for the manuscript, and the  
26 editor wants them to "come off the fence". Many editors reported deferring to additional peer  
27 reviewers in case of disagreements between the initially selected peer reviewers - described as a  
28 common occurrence. Another problematic aspect of the recommendation function was the lack of a  
29 common understanding of what the individual recommendation categories actually mean. Since this  
30 is a subjective recommendation, there are inherent variations in reviewers' views.  
31  
32  
33

### 34 **Roles that peer reviewers should not perform**

35

36 The last domain focused on roles that peer reviewers are *not* supposed to perform. Editors' accounts  
37 highlighted how peer reviewers regularly tend to comment on aspects that go beyond the content of  
38 manuscripts that fall squarely within the remit of editors. Editors from non-high ranking journals  
39 criticised peer reviewers who review manuscripts according to a self-determined quality threshold that  
40 they project onto the journal, despite requests for an objective assessment.  
41

42 *"...we would tell them to please review it like it is for the best and most influential journal*  
43 *- we will make the decision on what to accept but we want an objective review of the*  
44 *qualities of the study design and findings and so on - very often we would get the answer*  
45 *saying "It's good for you"...but that's not what we want. Of course we know that we're not*  
46 *going to get the best research, but regardless of that we would like to have an objective*  
47 *assessment."* (Co-Editor-in-Chief, specialty journal).  
48  
49

50 Editors of lower-ranking journals felt resentful at this "arrogant" and "dismissive" attitude, and yet  
51 were cognisant of the lower "quality" of the research that they receive and end up publishing in  
52 comparison with high-ranking journals until their journal gains "visibility" through external recognition  
53 in the form of an impact factor and becomes "attractive" to authors that offer better quality research:  
54  
55

56 *"So in this case my responsibility is mainly...to develop an important scientific new journal*  
57 *with quite good quality, scientific quality with a significant impact factor that could be*  
58 *attractive to the authors...So my, my task is to be attractive for authors and to expect that*  
59  
60

1  
2  
3 *they will, they will send to our journal as a best quality articles, manuscript in the field.*  
4 (Editor-in-Chief, specialty journal).  
5

6 In contrast, since the motivation for reviewers to deliver a high-quality report in high ranking journals  
7 was to maintain their status and reputation within the 'elite' scientific community, their reviewing  
8 standards are likely to be different than those for lower-ranked journals:  
9

10 *"I would be a bit surprised if someone would submit a really unkind, mean, unjustified*  
11 *review [to top journals]. I mean the stakes are just too high, no one, no one wants to*  
12 *submit a review like that and have the editors think poorly of them."* (Editor-in-Chief,  
13 specialty journal).  
14  
15  
16  
17

## 18 Peer reviewer tasks

19 Editors outlined a number of tasks which coalesced around four domains: (1) Organisation and  
20 approach to reviewing; (2) Make general comments; (3) Assess and address content for each section  
21 of the manuscript; and (4) Address ethical aspects.  
22  
23

### 24 **Organisation and approach to reviewing**

25 At the beginning of the reviewer report editors prefer to see a "summary of the key points" of the  
26 manuscript, which functions as a 'quality check' for editors "to be confident that they [the peer  
27 reviewers] have read it and understood it [the manuscript]". The majority of editors expect reviewers  
28 to provide a balanced view by identifying both "strengths and weaknesses of the manuscript". Editors  
29 also expect peer reviewers to "identify flaws" and differentiate between "fatal and addressable flaws"  
30 in order to understand and assess whether the manuscripts could be improved. Furthermore, a  
31 number of editors suggested that it is helpful to differentiate between "major and minor comments".  
32 It became evident that the approach to peer review is mostly aimed at helping editors in their decision  
33 making process.  
34  
35  
36

### 37 **Make general comments**

38 Editors specified that they expect to see some general and overarching comments that provide an  
39 "overall picture" of the "importance and significance" of the manuscript as well as "relevance to field  
40 and (clinical) practice". Additional comments should focus on the general aspects of "validity",  
41 "quality", "technical merit" and "rigor". The assessment of "novelty" and "originality" was mentioned  
42 by a number of editors, however there was a clear divide between high-ranking journals and other  
43 journals – with editors from the latter repeatedly acknowledged that manuscripts with "novel findings"  
44 tend to be preferentially submitted to high-ranking journals.  
45  
46  
47

### 48 **Assess and address content for each section of the manuscript**

49 The majority of editors expected peer reviewers to thoroughly appraise the content of each manuscript  
50 section. The "soundness of the methodology used" was most frequently mentioned by peer reviewers.  
51 Generally, the level of detail expected of peer reviewers seemed to differ according to the resources  
52 that journals had as well as the editors' own abilities. While this was oftentimes implicit, it was  
53 apparent in the example of 'statistics'. For example, while a number of journals reported to employ a  
54 "statistical review by default" other had to rely heavily on peer reviewers for that to supplement their  
55 own limitations:  
56  
57

58 *"...bringing expertise such as looking at the statistical analysis which is not my strong point*  
59 *at all. So bringing that sort of expertise to it."* (Co-Editor-in-Chief, specialty journal).  
60

1  
2  
3  
4 Another aspect that was repeatedly mentioned was the focus on 'spin' in the discussion/conclusion  
5 section. Although not explicitly named as 'spin' editors want peer reviewers to look out for any "claims  
6 that are not supported by the results", "overenthusiasm" and "extrapolation".  
7  
8

### 9 **Address ethical aspects**

10 Editors reported that their submission systems typically offers two text boxes to peer reviewers – one  
11 for comments to the authors and the other one for confidential comments to the editors. The latter  
12 should be used by peer reviewers to advise the editor on any aspects related to "ethics" and 'research  
13 integrity' such as suspicion of research misconduct and detrimental and questionable research  
14 practices. The confidential comments are a means of avoiding any potential conflict arising from such  
15 criticism between authors and reviewers.  
16  
17

## 18 **Discussion**

19 This study provided an in-depth, behind-the-scenes account of 56 editors' experiences with, and  
20 expectations towards, peer reviewers. We found that journal editors' understanding of the roles and  
21 tasks of peer reviewers are profoundly shaped by each journal's unique context and characteristics,  
22 including financial and human resources and journal reputation. Thus, in line with existing literature,  
23 we found that editorial decision-making and expectations toward peer reviewers are unavoidably  
24 shaped by social externalities that at times may have little to do with scientific content of the  
25 manuscript (4,15). The complex system of social interactions underlying the decision-making process  
26 was exemplified through the link between peer reviewers' recommendations and editorial decision-  
27 making – this was a key aspect that our scoping review (3) had identified as requiring further  
28 exploration during this study. We found that the majority of our interviewees gave considerable  
29 importance to the reviewers' recommendations function, despite concerns regarding the lack of a  
30 commonly agreed-upon definition of the available options, frequent disagreement among peer  
31 reviewers (16) and existing bias (17). Given these limitations, editors should seriously consider doing  
32 away with this requirement altogether. Instead, considerable efforts should be made to communicate  
33 to peer reviewers to place their focus on the evaluation of strengths and weaknesses, major and minor  
34 flaws of manuscripts across multiple dimensions and suggestions for improvement. This would also  
35 help to realign the role of peer reviewers as 'advisors' rather than convey the idea that they are  
36 decision makers. It would also help to delete some of the existing malleable boundaries of authority  
37 and responsibility on the review process placing the editor in the sole decision maker position. This  
38 recommendation is in line with existing research on relationship between external reviewers'  
39 recommendations and the editorial outcome of manuscripts (18).  
40

41 Furthermore, although we found considerable agreement among editors concerning technical tasks of  
42 manuscript reviewing, there was an apparent difference in editors' expectations of the level of depth  
43 and detail they would like to see in a reviewer report. Our study sample showcases the status quo of  
44 the editors' market, where there are a few full-time journal editors. The remainder work on a part time  
45 basis, usually for a symbolic or stipend-like payment, and combine their editorial responsibilities with  
46 research, education, and/or clinical duties (31). Therefore, it might be the case that their own limited  
47 time might lead to expectations of greater detail from reviewers. Journal resource availability might  
48 also have an impact on their expectations, such as requests for comments related to statistical analysis  
49 in the case of journals with fewer resources. Given these existing contextual journal differences and  
50 hence peer review report requirements, better ways of communicating editorial expectations to peer  
51 reviewers (who might review for different journals having different expectations) are needed.  
52 Currently, these expectations are communicated through publishers' and journal-specific guidelines.  
53  
54  
55  
56  
57  
58  
59  
60

1  
2  
3 However, various studies in this area suggest that these are often not readily available, or are generic  
4 and non-specific (19) and thus do not properly convey expectations.  
5

6  
7 Another key finding was interviewed editors' apparent lack of appreciation of the importance of formal  
8 peer reviewer training. The majority embraced a somewhat simplistic and 'linear' view that 'good'  
9 authors (i.e. usually defined as authors with extensive authorship in prestigious journals) make 'good'  
10 peer reviewers. However, there is no evidence to support this perspective; evidence linking authorship  
11 experience and academic qualifications to high-quality reviews is very limited. The only substantial  
12 study in this field was unable to predict reviewer performance from easily identifiable types of  
13 experience or qualifications. The study authors also found, contrary to the beliefs prevalent among our  
14 interviewees, that factors such as academic rank and seniority do not predict performance (20). In fact,  
15 studies that have attempted to determine whether some combination of peer reviewer experience  
16 could predict the quality of their subsequent reviews found that the highest-rated reviewers tended  
17 to be young, and that the quality of peer review did not correlate with academic rank (21–24).  
18 However, most of these studies were relatively limited in size, were a sub-analysis of a study of some  
19 other intervention, and are more than 20 years old; hence, the evidence base for this finding is limited.  
20 Thus far, in the absence of additional research demonstrating the contrary, there are no criteria that  
21 predict good peer reviewer performance.  
22

23  
24 Given this situation, we believe that the skillset required to be a good author is not necessarily the  
25 same as that required to be a good peer reviewer. In a recent study (2019) by Superchi et al. that  
26 systematically reviewed tools used by journal editors to assess the quality of peer review reports, the  
27 authors identified nine quality domains pertaining to peer reviewer skills, of which five (i.e.  
28 relevance and originality of the study, interpretation of study results, strength and weaknesses,  
29 manuscript presentation and organisation) arguably overlap with the skillset of authors. The remainder  
30 are directly concerned with skills related to structure and delivery of the peer review report (25), which  
31 we believe may not automatically follow from being a prolific author. Therefore, we propose that the  
32 following four domains can, and in principle should, be taught to prospective reviewers: (1) structure  
33 of the reviewer's comments; (2) characteristics of reviewer's comments including concepts such as  
34 clarity, constructiveness, detail/thoroughness, fairness, knowledgeability and tone; (3) timeliness of  
35 the review report; and (4) usefulness of the review report to editorial decision-making and manuscript  
36 improvement. Based on the findings of this study, our previous scoping review (26) and the study by  
37 Superchi et al., it appears that helping to improve the manuscript not only entails providing specific  
38 and detailed comments about scientific aspects of the manuscript, but also comments that empower  
39 and motivate authors – a skill that is closely aligned to the supportive function of peer reviewers that  
40 also emerged from our study.  
41

42  
43 Notwithstanding various surveys on educational needs of young clinicians and researchers across  
44 different biomedical fields having revealed a strong interest in attaining better reviewing skills (27),  
45 such training is still not commonly included in biomedical postgraduate education programmes. At the  
46 same time, existing educational interventions have shown underwhelming results, and their wider  
47 applicability remains questionable due to their relatively poor methodological quality (28).  
48

49  
50 Given this lack of evidence we think it would be helpful to conduct research on the actual content of  
51 peer reviewers' reports to help establish educational needs for peer reviewing (29).  
52  
53

54  
55 According to the majority of our interviewees, it is becoming increasingly difficult to find experienced  
56 authors to review manuscripts. On the other hand, junior researchers are often more willing to accept  
57 invitations, including from lower-ranking journals. This is in line with existing evidence (30) and is likely  
58 to be due to differing levels of motivation (31). Thus, there is an opportunity for acknowledging that  
59 the breadth and variety of reviewing roles and tasks may require a more granular approach by editors  
60

1  
2  
3 when assigning peer reviewers to a manuscript. Achieving a balance of senior and junior reviewers  
4 would cater to their wide range of reviewing motivations, as well as to their individual expertise. At  
5 the same time, the question of how to attract this ideal mix of reviewers remains. The rewards and  
6 incentives offered by most journal editors among our sample are likely to be more attractive for junior  
7 peer reviewers than senior reviewers. Based on editors' comments on the lack of effectiveness of the  
8 provided incentives and the general difficulty to get peer reviewers to accept invitation across the  
9 biomedical field (32,33) and offering higher-level rewards is key. For example, the majority of  
10 reviewers are affiliated to academic institutions, which are therefore critical stakeholders in the peer  
11 review process. If peer reviewing is incentivized and rewarded as part of one's academic career  
12 advancement, it is likely to be as important - if not more important - than whatever journals can offer.  
13 Some academic institutions, for example the University of Glasgow (34) have started rewarding peer  
14 reviewer and editor responsibilities as a core requirement for academic promotion and achieving  
15 tenure. Academic institutions may also play a key role in overcoming the existing dominance of journal-  
16 based metrics, such as Journal Impact Factors, as the primary indicators or measures of the quality of  
17 individual research articles. Our interviewees reported that peer reviewers apply different reviewing  
18 standards as they deem fit to journals depending on their impact factor or 'status' within the field. This  
19 in turn may have an impact on the quality of published research and is closely related to one of the  
20 critical question identified in our scoping review "Who is responsible for publication of low-quality  
21 manuscripts?". The peer review process is part of the social infrastructure of research (35), therefore  
22 it is the responsibility of all actors to contribute to better research. Academic institutions and other  
23 stakeholders such a funders can play a key role to implement alternative measures of research quality  
24 (36) and a stronger focus on research quality.

## 31 Limitations

32  
33 Our recruitment approach gave rise to a key limitation of this study. Based on our collective experience  
34 as researchers and a former staff member of a biomedical journal (DH) that struggled with response  
35 rates involving studies with editorial staff, we anticipated that it would be challenging to recruit journal  
36 editors to participate in our research. The majority of journal editors of biomedical journals are part-  
37 timers who concurrently work as practitioners, researchers, educators and may have other additional  
38 roles. In the light of this situation, our employment of purposive maximum variation sampling resulted  
39 in predominant contact with Editors-in-Chief. While one of the strengths of this study is that research  
40 participants were diverse in terms of demographic characteristics and characteristics related to their  
41 journal (Table 1), two thirds of participants had this role within their respective journal. Although the  
42 lead researcher asked potential interviewees either to participate themselves or to recommend  
43 suitable journal colleagues who could be contacted in their stead, it is likely that this approach led to  
44 the relative homogeneity of our study sample. This may limit the generalisability of the results due to  
45 the limited representation of other editorial staff members involved in the peer review process. Our  
46 insights from the interviews and wider author and team experiences suggest that Editors-in-Chief  
47 might primarily be responsible for higher-level tasks around the journal, and possibly be less involved  
48 in the direct communication process with authors and peer reviewers. Therefore, there is a need to  
49 explore whether the involvement of editorial staff in other positions would have produced convergent  
50 or divergent findings.

## 56 Conclusion

57  
58 This study provides more context for, and details about, the roles and tasks of peer reviewers in  
59 biomedical journals that we identified in our previously conducted scoping review. It also helps to  
60

1  
2  
3 explain attitudes and opinions expressed in existing surveys of editors, reviewers and authors on the  
4 peer review process. Our research provides a greater understanding of the current status quo of the  
5 review process and why particular issues arise around roles and tasks of peer reviewers, and offers  
6 insight into how these issues can be addressed.  
7

8 Further research is needed on actual performance of peer reviewers looking into the content of peer  
9 reviewer reports on a large scale to inform meaningful training interventions and to improve existing  
10 guidance.  
11  
12  
13  
14  
15  
16  
17  
18  
19

## 20 Footnotes

21 **Contributors:** All authors have made substantive intellectual contributions to the development of  
22 this manuscript. KG and DH jointly contributed to study conception and design. While KG led data  
23 collection, analysis and writing of the manuscript DH led the supervision of all these steps and  
24 approved the final manuscript.  
25

26 **Funding:** This project was supported by the European Union's Horizon 2020 research and innovation  
27 programme under the Marie Skłodowska-Curie grant agreement No 676207.  
28

29 **Competing interests:** KG and DM had an advisory role with Publons Academy. At the time of data  
30 collection for this study KG conducted a secondment at the BMJ. The remaining author (DH) declares  
31 no competing interests.  
32  
33

34 **Patient consent:** Not applicable.  
35

36 **Ethics approval:** This project has been evaluated and approved by the University of Split, Medical  
37 School Ethics Committee. Ethical approval (Reference number 2181-198-03-04-17-0029) was granted  
38 in May 2017. Prospective interviewees were provided with information about the study and asked to  
39 sign a written consent form prior to commencing the interview. Before starting the interview, study  
40 objectives were reiterated and additional information provided where necessary. Their consent to  
41 participate was also audio-recorded. Copies of the invitation letter, information sheet, and consent  
42 form are available from the leading author (KG).  
43  
44

45 **Data sharing statement:** The data generated and/or analyzed in the study are not publicly available  
46 due to participant anonymity, but may be available from the corresponding author on reasonable  
47 request that includes a study protocol, ethical approval and data use agreement.  
48

49 **Acknowledgements:** We would like to express our thanks to Alice Biggane (PhD candidate on the  
50 MiRoR project) for her help in reviewing this manuscript prior to submission.  
51  
52  
53  
54

## 55 References

- 56 1. Glonti K, Cauchi D, Cobo E, Boutron I, Moher D, Hren D. A scoping review protocol on the roles  
57 and tasks of peer reviewers in the manuscript review process in biomedical journals. *BMJ Open*.  
58 2017 Oct 1;7(10):e017468.  
59  
60



- 1
  - 2
  - 3
  - 4
  - 5
  - 6
  - 7
  - 8
  - 9
  - 10
  - 11
  - 12
  - 13
  - 14
  - 15
  - 16
  - 17
  - 18
  - 19
  - 20
  - 21
  - 22
  - 23
  - 24
  - 25
  - 26
  - 27
  - 28
  - 29
  - 30
  - 31
  - 32
  - 33
  - 34
  - 35
  - 36
  - 37
  - 38
  - 39
  - 40
  - 41
  - 42
  - 43
  - 44
  - 45
  - 46
  - 47
  - 48
  - 49
  - 50
  - 51
  - 52
  - 53
  - 54
  - 55
  - 56
  - 57
  - 58
  - 59
  - 60
2. Moher D, Galipeau J, Alam S, Barbour V, Bartolomeos K, Baskin P, et al. Core competencies for scientific editors of biomedical journals: consensus statement. *BMC Med*. 2017 Sep 11;15(1):167.
  3. Glonti K, Cauchi D, Cobo E, Boutron I, Moher D, Hren D. A scoping review on the roles and tasks of peer reviewers in the manuscript review process in biomedical journals. *BMC Med*. 2019 Jun 20;17(1):118.
  4. Lipworth WL, Kerridge IH, Carter SM, Little M. Journal peer review in context: A qualitative study of the social and subjective dimensions of manuscript review in biomedical publishing. *Soc Sci Med* 1982. 2011 Apr;72(7):1056–63.
  5. Tong A, Sainsbury P, Craig J. Consolidated criteria for reporting qualitative research (COREQ): a 32-item checklist for interviews and focus groups. *Int J Qual Health Care*. 2007 Dec 1;19(6):349–57.
  6. Glonti K, Hren D. Editors' perspectives on the peer-review process in biomedical journals: protocol for a qualitative study. *BMJ Open*. 2018 Oct 1;8(10):e020568.
  7. Patton M. *Qualitative Research and Evaluation Methods*, 209-339. 2002;
  8. Projet MiRoR | An innovative and ambitious joint doctoral training programme [Internet]. [cited 2017 May 2]. Available from: <http://mirror-ejd.eu/>
  9. Rennie D, Flanagan A, Godlee F, Bloom T. The Eighth International Congress on Peer Review and Biomedical Publication: A Call for Research. *JAMA*. 2015 May 26;313(20):2031–2.
  10. Sandelowski M. Sample size in qualitative research. *Res Nurs Health*. 1995 Apr 1;18(2):179–83.
  11. Braun V, Clarke V. Using thematic analysis in psychology. *Qual Res Psychol*. 2006;3(2):77–101.
  12. Guest G, Bunce A, Johnson L. How many interviews are enough? An experiment with data saturation and variability. *Field Methods*. 2006;18(1):59–82.
  13. Nowell LS, Norris JM, White DE, Moules NJ. Thematic Analysis: Striving to Meet the Trustworthiness Criteria. *Int J Qual Methods*. 2017;16(1):1609406917733847.
  14. Lincoln Y, Guba E. *Naturalistic inquiry*. Newbury Park. 1985;
  15. Dickersin K, Ssemanda E, Mansell C, Rennie D. What do the JAMA editors say when they discuss manuscripts that they are considering for publication? Developing a schema for classifying the content of editorial discussion. *BMC Med Res Methodol*. 2007 Sep 25;7:44.
  16. Rothwell PM, Martyn CN. Reproducibility of peer review in clinical neuroscience - Is agreement between reviewers any greater than would be expected by chance alone? *Brain*. 2000 Sep;123:1964–9.
  17. Lee CJ, Sugimoto CR, Zhang G, Cronin B. Bias in peer review. *J Am Soc Inf Sci Technol*. 2013 Jan 1;64(1):2–17.
  18. Kravitz RL, Franks P, Feldman MD. Editorial peer reviewers' recommendations at a general medical journal: are they reliable and do editors care? *PLoS One* [Internet]. 2010;5. Available from: <http://dx.doi.org/10.1371/journal.pone.0010072>

19. Hirst A, Altman DG. Are Peer Reviewers Encouraged to Use Reporting Guidelines? A Survey of 116 Health Research Journals. *PLOS ONE*. 2012 Apr 27;7(4):e35621.
20. Callaham ML, Tercier J. The Relationship of Previous Training and Experience of Journal Peer Reviewers to Subsequent Review Quality. *PLOS Med*. 2007 Jan 30;4(1):e40.
21. Kliewer MA, Freed KS, DeLong DM, Pickhardt PJ, Provenzale JM. Reviewing the reviewers: comparison of review quality and reviewer characteristics at the American Journal of Roentgenology. *AJR Am J Roentgenol*. 2005 Jun;184(6):1731–5.
22. Evans AT, McNutt RA, Fletcher SW, Fletcher RH. The characteristics of peer reviewers who produce good-quality reviews. *J Gen Intern Med*. 1993;(8):422–8.
23. Stossel TP. Reviewer status and review quality: Experience of the Journal of Clinical Investigation. 1985;
24. Black N, Rooyen S, Godlee F, Smith R, Evans S. What makes a good reviewer and a good review for a general medical journal? *JAMA* [Internet]. 1998;280. Available from: <http://dx.doi.org/10.1001/jama.280.3.231>
25. Superchi C, González JA, Solà I, Cobo E, Hren D, Boutron I. Tools used to assess the quality of peer review reports: a methodological systematic review. *BMC Med Res Methodol*. 2019 Mar 6;19(1):48.
26. Galipeau J, Barbour V, Baskin P, Bell-Syer S, Cobey K, Cumpston M, et al. A scoping review of competencies for scientific editors of biomedical journals. *BMC Med*. 2016 Feb 2;14:1–17.
27. Rodríguez-Carrio J, Putrik P, Sepriano A, Moltó A, Nikiphorou E, Gossec L, et al. Improving the peer review skills of young rheumatologists and researchers in rheumatology: the EMEUNET Peer Review Mentoring Program. *RMD Open*. 2018 Feb 1;4(1):e000619.
28. Bruce R, Chauvin A, Trinquart L, Ravaud P, Boutron I. Impact of interventions to improve the quality of peer review of biomedical journals: a systematic review and meta-analysis. *BMC Med*. 2016;14(1):85.
29. Lee CJ, Moher D. Promote scientific integrity via journal peer review data. *Science*. 2017 Jul 21;357(6348):256–7.
30. Casnici N, Grimaldo F, Gilbert N, Squazzoni F. Attitudes of referees in a multidisciplinary journal: An empirical analysis. *J Assoc Inf Sci Technol*. 2017;68(7):1763–71.
31. Zaharie MA, Osoian CL. Peer review motivation frames: A qualitative approach. *Eur Manag J*. 2016;34(1):69–79.
32. Tite L, Schroter S. Why do peer reviewers decline to review? A survey. *J Epidemiol Community Health*. 2007;61(1):9–12.
33. Willis M. Why do peer reviewers decline to review manuscripts? A study of reviewer invitation responses. *Learn Publ*. 2016;29(1):5–7.
34. University of Glasgow. Academic Promotion Criteria Research Scientist Grades 7-9, University of Glasgow [Internet]. Available from: [https://www.gla.ac.uk/media/media\\_498056\\_en.pdf](https://www.gla.ac.uk/media/media_498056_en.pdf)

- 1  
2  
3 35. June 12th, communication 2019 | Academic, review P, Comments R policy | 4. Peer review is not  
4 just quality control, it is part of the social infrastructure of research [Internet]. Impact of Social  
5 Sciences. 2019 [cited 2019 Jun 28]. Available from:  
6 [https://blogs.lse.ac.uk/impactofsocialsciences/2019/06/12/peer-review-is-not-just-quality-](https://blogs.lse.ac.uk/impactofsocialsciences/2019/06/12/peer-review-is-not-just-quality-control-it-is-part-of-the-social-infrastructure-of-research/)  
7 [control-it-is-part-of-the-social-infrastructure-of-research/](https://blogs.lse.ac.uk/impactofsocialsciences/2019/06/12/peer-review-is-not-just-quality-control-it-is-part-of-the-social-infrastructure-of-research/)  
8  
9  
10 36. Moher D, Naudet F, Cristea IA, Miedema F, Ioannidis JPA, Goodman SN. Assessing scientists for  
11 hiring, promotion, and tenure. PLOS Biol. 2018 Mar 29;16(3):e2004089.  
12  
13  
14  
15  
16  
17  
18  
19  
20  
21  
22  
23  
24  
25  
26  
27  
28  
29  
30  
31  
32  
33  
34  
35  
36  
37  
38  
39  
40  
41  
42  
43  
44  
45  
46  
47  
48  
49  
50  
51  
52  
53  
54  
55  
56  
57  
58  
59  
60

For peer review only

## Topic guide for semi-structured interviews

| Key area of investigation                 | Topics                                                                                                                                                 | Questions and prompts                                                                                                                                                                                                                                                                                                                                                                                                                                                                                                                                                                                                                                                                                                                                                                                                                                                                                                                                                                                                                                                                                                                                                                                                                                                                                                                                                                                                                                                                                                                                                          |
|-------------------------------------------|--------------------------------------------------------------------------------------------------------------------------------------------------------|--------------------------------------------------------------------------------------------------------------------------------------------------------------------------------------------------------------------------------------------------------------------------------------------------------------------------------------------------------------------------------------------------------------------------------------------------------------------------------------------------------------------------------------------------------------------------------------------------------------------------------------------------------------------------------------------------------------------------------------------------------------------------------------------------------------------------------------------------------------------------------------------------------------------------------------------------------------------------------------------------------------------------------------------------------------------------------------------------------------------------------------------------------------------------------------------------------------------------------------------------------------------------------------------------------------------------------------------------------------------------------------------------------------------------------------------------------------------------------------------------------------------------------------------------------------------------------|
| Background information                    | <ul style="list-style-type: none"> <li>- Explore personal background</li> <li>- Level of experience</li> <li>- Roles and tasks as an editor</li> </ul> | <ul style="list-style-type: none"> <li>• Tell me about your journal and the job you have.</li> <li>• How long have you been in this position?</li> <li>• Did you hold any other editorial position before your current position? If yes, what were your responsibilities then?</li> </ul> <p>Prompt: percentage of time devoted to editorial duties (e.g., part time, full time)</p> <ul style="list-style-type: none"> <li>• What are your current responsibilities (roles and tasks)?</li> </ul>                                                                                                                                                                                                                                                                                                                                                                                                                                                                                                                                                                                                                                                                                                                                                                                                                                                                                                                                                                                                                                                                             |
| Journal set-up                            | <ul style="list-style-type: none"> <li>- Explore journal set-up</li> </ul>                                                                             | <ul style="list-style-type: none"> <li>• Tell me about your journal - how does it work?</li> </ul> <p>Prompt: availability of resources (e.g. human and financial resources), relationship with publisher</p> <ul style="list-style-type: none"> <li>• How does the peer review process work in your journal?</li> </ul> <p>Prompt: submission system, peer review model (e.g., single blind etc)</p> <ul style="list-style-type: none"> <li>• What do you do within the process?</li> </ul> <p>Prompt: Interaction with peer reviewers</p>                                                                                                                                                                                                                                                                                                                                                                                                                                                                                                                                                                                                                                                                                                                                                                                                                                                                                                                                                                                                                                    |
| Opinion on peer reviewers roles and tasks | <ul style="list-style-type: none"> <li>- Roles and tasks of peer reviewers</li> <li>- Expectations</li> </ul>                                          | <ul style="list-style-type: none"> <li>• What do you expect from peer reviewers in terms of their roles and tasks?</li> <li>• What about training for peer reviewers?</li> </ul> <p>Prompt: use items from scoping review (roles and task related), attitudes and beliefs (e.g. on training, how they peer review themselves) , organisational expectations</p> <ul style="list-style-type: none"> <li>• How do you let your reviewers know what you expect from them?</li> </ul> <p>Prompt: journal guidelines</p> <ul style="list-style-type: none"> <li>• Can you tell me about a specific situation when you were not satisfied with a review report or with a peer reviewer?</li> <li>• What did you do in that a situation?</li> </ul> <p>Prompt: probe for factors other than being late with a review, or not doing a review once you they have accepted it</p> <ul style="list-style-type: none"> <li>• Can you tell me about a situation when you were exceptionally satisfied with a review or with a peer reviewer?</li> <li>• Were there situations (in regards to the roles and task of reviewers) when you disagreed with the other editors you work with? What about? What happened?</li> <li>• What about other journals, do roles and tasks differ among journals in your field?</li> </ul> <p>Prompt: if yes (i.e. differences exist), then:</p> <ul style="list-style-type: none"> <li>• How does this affect the process?</li> <li>• How does it affect your communication?</li> <li>• How do you negotiate those differences? Does it matter?</li> </ul> |

|                                                                                                                                                                                                                                                                                                                                          |                                                                                              |                                                                                                                                                                                                                                                                                                                                                                                                                                                                                              |
|------------------------------------------------------------------------------------------------------------------------------------------------------------------------------------------------------------------------------------------------------------------------------------------------------------------------------------------|----------------------------------------------------------------------------------------------|----------------------------------------------------------------------------------------------------------------------------------------------------------------------------------------------------------------------------------------------------------------------------------------------------------------------------------------------------------------------------------------------------------------------------------------------------------------------------------------------|
| <p>1<br/>2<br/>3<br/>4<br/>5<br/>6<br/>7<br/>8<br/>9<br/>10<br/>11<br/>12<br/>13<br/>14<br/>15<br/>16</p> <p>Communication between editors, peer reviewers and authors</p>                                                                                                                                                               | <p>- Communication between the three parties</p> <p>- Potential conflicts</p> <p>- Power</p> | <ul style="list-style-type: none"> <li>• Can you describe your experience of the communication process between editors, authors and peer reviews?</li> <li>• How do you communicate with authors and peer reviewers?</li> <li>• Can you give me some specific examples of situations where this communication is challenging?</li> </ul> <p>Prompt:<br/>What are potential conflicts?<br/>When do disagreements arise?<br/>What happens if there is disagreement between peer reviewers?</p> |
| <p>17<br/>18<br/>19<br/>20<br/>21<br/>22<br/>23<br/>24<br/>25<br/>26<br/>27<br/>28<br/>29<br/>30<br/>31<br/>32<br/>33<br/>34<br/>35<br/>36<br/>37<br/>38<br/>39<br/>40<br/>41<br/>42<br/>43<br/>44<br/>45<br/>46<br/>47<br/>48<br/>49<br/>50<br/>51<br/>52<br/>53<br/>54<br/>55<br/>56<br/>57<br/>58<br/>59<br/>60</p> <p>Conclusion</p> | <p>- Snowballing</p> <p>- Documents</p> <p>- Final comments</p>                              | <ul style="list-style-type: none"> <li>• Is there anybody else whom you think I should speak to?</li> <li>• Any articles/documents I can access/should look at?</li> <li>• Any final comments? Is there anything else that you think is important to mention?</li> </ul>                                                                                                                                                                                                                     |

## Actions undertaken to establish trustworthiness of analysis

| Phases of thematic analysis             | Techniques for establishing trustworthiness                                                                                                                                                                                                                                                                                                                                                                                         |
|-----------------------------------------|-------------------------------------------------------------------------------------------------------------------------------------------------------------------------------------------------------------------------------------------------------------------------------------------------------------------------------------------------------------------------------------------------------------------------------------|
| Phase 1:<br>Familiarizing with the data | <b>Prolonged engagement with data</b> (credibility) <ul style="list-style-type: none"> <li>- KG performed multiple readings of all transcripts</li> </ul> <b>Reflexive journaling</b> (confirmability) <ul style="list-style-type: none"> <li>- Documentation of thoughts and potential codes/themes were taken during phase 1 and throughout the entire data analysis</li> </ul>                                                   |
| Phase 2:<br>Generating initial codes    | <b>Member-checking and peer debriefing</b> (credibility) <ul style="list-style-type: none"> <li>- The first six interviews were coded independently by two researchers (KG and DH) leading to the creation of the initial codebook</li> </ul> <b>Audit trail</b> (confirmability) <ul style="list-style-type: none"> <li>- Codebook was updated after every new interview creating an audit trail of the code generation</li> </ul> |
| Phase 3:<br>Searching for themes        | <b>Researcher triangulation</b> (confirmability) <ul style="list-style-type: none"> <li>- Regular team meetings to review findings from different perspectives</li> <li>- Diagramming/drawing to make sense of theme connections</li> </ul>                                                                                                                                                                                         |
| Phase 4:<br>Reviewing themes            | <b>Researcher triangulation</b> (confirmability) <ul style="list-style-type: none"> <li>- Regular team meetings to vet themes and subthemes</li> </ul> <b>Audit trail</b> (confirmability) <ul style="list-style-type: none"> <li>- We returned to raw data to check for referential adequacy</li> </ul>                                                                                                                            |
| Phase 5:<br>Defining and naming themes  | <b>Researcher triangulation</b> (confirmability) <ul style="list-style-type: none"> <li>- Team consensus on themes</li> </ul>                                                                                                                                                                                                                                                                                                       |
| Phase 6:<br>Producing the report        | <b>Thick description</b> (transferability) <ul style="list-style-type: none"> <li>- The methodological approach and analytical choices were described in detail in previously published study protocol</li> <li>- We provide detailed descriptions of study results</li> <li>- Peer debriefing with researchers outside of the core group (IB and DM)</li> </ul>                                                                    |

## Consolidated criteria for reporting qualitative studies (COREQ): 32-item checklist

Developed from:

Tong A, Sainsbury P, Craig J. Consolidated criteria for reporting qualitative research (COREQ): a 32-item checklist for interviews and focus groups. *International Journal for Quality in Health Care*. 2007. Volume 19, Number 6: pp. 349 – 357

**YOU MUST PROVIDE A RESPONSE FOR ALL ITEMS. ENTER N/A IF NOT APPLICABLE**

| No. Item                                       | Guide questions/description                                                                                                                              | Reported on Page #                           |
|------------------------------------------------|----------------------------------------------------------------------------------------------------------------------------------------------------------|----------------------------------------------|
| <b>Domain 1: Research team and reflexivity</b> |                                                                                                                                                          |                                              |
| <i>Personal Characteristics</i>                |                                                                                                                                                          |                                              |
| 1. Interviewer/facilitator                     | Which author/s conducted the interview or focus group?                                                                                                   | Page 3                                       |
| 2. Credentials                                 | What were the researcher's credentials?<br>E.g. PhD, MD                                                                                                  | Page 3                                       |
| 3. Occupation                                  | What was their occupation at the time of the study?                                                                                                      | Page 3                                       |
| 4. Gender                                      | Was the researcher male or female?                                                                                                                       | N/A                                          |
| 5. Experience and training                     | What experience or training did the researcher have?                                                                                                     | Page 3                                       |
| <i>Relationship with participants</i>          |                                                                                                                                                          |                                              |
| 6. Relationship established                    | Was a relationship established prior to study commencement?                                                                                              | N/A                                          |
| 7. Participant knowledge of the interviewer    | What did the participants know about the researcher? e.g. personal goals, reasons for doing the research                                                 | N/A                                          |
| 8. Interviewer characteristics                 | What characteristics were reported about the interviewer/facilitator? e.g. Bias, assumptions, reasons and interests in the research topic                | Page 3                                       |
| <b>Domain 2: study design</b>                  |                                                                                                                                                          |                                              |
| <i>Theoretical framework</i>                   |                                                                                                                                                          |                                              |
| 9. Methodological orientation and Theory       | What methodological orientation was stated to underpin the study? e.g. grounded theory, discourse analysis, ethnography, phenomenology, content analysis | Page 2 (previously published study protocol) |
| <i>Participant selection</i>                   |                                                                                                                                                          |                                              |
| 10. Sampling                                   | How were participants selected? e.g. purposive, convenience, consecutive, snowball                                                                       | Page 2                                       |
| 11. Method of approach                         | How were participants approached? e.g. face-to-face, telephone, mail, email                                                                              | Page 2-3                                     |

|                                        |                                                                                                                                 |                                        |
|----------------------------------------|---------------------------------------------------------------------------------------------------------------------------------|----------------------------------------|
| 12. Sample size                        | How many participants were in the study?                                                                                        | Page 2-3, and published study protocol |
| 13. Non-participation                  | How many people refused to participate or dropped out? Reasons?                                                                 | N/A                                    |
| <i>Setting</i>                         |                                                                                                                                 |                                        |
| 14. Setting of data collection         | Where was the data collected? e.g. home, clinic, workplace                                                                      | N/A                                    |
| 15. Presence of non-participants       | Was anyone else present besides the participants and researchers?                                                               | N/A                                    |
| 16. Description of sample              | What are the important characteristics of the sample? e.g. demographic data, date                                               | Page 3-4                               |
| <i>Data collection</i>                 |                                                                                                                                 |                                        |
| 17. Interview guide                    | Were questions, prompts, guides provided by the authors? Was it pilot tested?                                                   | Page 3, additional file                |
| 18. Repeat interviews                  | Were repeat interviews carried out? If yes, how many?                                                                           | N/A                                    |
| 19. Audio/visual recording             | Did the research use audio or visual recording to collect the data?                                                             | Page 3                                 |
| 20. Field notes                        | Were field notes made during and/or after the interview or focus group?                                                         | Page 3                                 |
| 21. Duration                           | What was the duration of the inter views or focus group?                                                                        | Methods                                |
| 22. Data saturation                    | Was data saturation discussed?                                                                                                  | Page 3                                 |
| 23. Transcripts returned               | Were transcripts returned to participants for comment and/or correction?                                                        | N/A                                    |
| <b>Domain 3: analysis and findings</b> |                                                                                                                                 |                                        |
| <i>Data analysis</i>                   |                                                                                                                                 |                                        |
| 24. Number of data coders              | How many data coders coded the data?                                                                                            | Page 3                                 |
| 25. Description of the coding tree     | Did authors provide a description of the coding tree?                                                                           | N/A                                    |
| 26. Derivation of themes               | Were themes identified in advance or derived from the data?                                                                     | Page 2-3                               |
| 27. Software                           | What software, if applicable, was used to manage the data?                                                                      | NVivo                                  |
| 28. Participant checking               | Did participants provide feedback on the findings?                                                                              | N/A                                    |
| <i>Reporting</i>                       |                                                                                                                                 |                                        |
| 29. Quotations presented               | Were participant quotations presented to illustrate the themes/findings? Was each quotation identified? e.g. participant number | Page 4-10                              |
| 30. Data and findings consistent       | Was there consistency between the data presented and the findings?                                                              | Page 11-13                             |
| 31. Clarity of major themes            | Were major themes clearly presented in the findings?                                                                            | Page 4-10                              |
| 32. Clarity of minor themes            | Is there a description of diverse cases or discussion of minor themes?                                                          | Page 4-10                              |



1  
2  
3  
4  
5  
6  
7  
8  
9  
10  
11  
12  
13  
14  
15  
16  
17  
18  
19  
20  
21  
22  
23  
24  
25  
26  
27  
28  
29  
30  
31  
32  
33  
34  
35  
36  
37  
38  
39  
40  
41  
42  
43  
44  
45  
46  
47  
48  
49  
50  
51  
52  
53  
54  
55  
56  
57  
58  
59  
60

For peer review only

# BMJ Open

## Editors' perspectives on the roles and tasks of peer reviewers in biomedical journals: A qualitative study

|                                 |                                                                                                                                                                                                                                                                                                                                                                                                       |
|---------------------------------|-------------------------------------------------------------------------------------------------------------------------------------------------------------------------------------------------------------------------------------------------------------------------------------------------------------------------------------------------------------------------------------------------------|
| Journal:                        | <i>BMJ Open</i>                                                                                                                                                                                                                                                                                                                                                                                       |
| Manuscript ID                   | bmjopen-2019-033421.R1                                                                                                                                                                                                                                                                                                                                                                                |
| Article Type:                   | Original research                                                                                                                                                                                                                                                                                                                                                                                     |
| Date Submitted by the Author:   | 26-Sep-2019                                                                                                                                                                                                                                                                                                                                                                                           |
| Complete List of Authors:       | Glonti, Ketevan; Sveuciliste u Splitu, Department of Psychology, School of Humanities and Social Sciences; Université de Paris, CRESS, INSERM, INRA<br>Boutron, Isabelle; Université de Paris, CRESS, INSERM, INRA<br>Moher, David; Ottawa Hospital Research Institute, Ottawa Methods Centre<br>Hren, Darko; University of Split, Department of Psychology, School of Humanities and Social Sciences |
| <b>Primary Subject Heading</b>: | Medical publishing and peer review                                                                                                                                                                                                                                                                                                                                                                    |
| Secondary Subject Heading:      | Qualitative research                                                                                                                                                                                                                                                                                                                                                                                  |
| Keywords:                       | Peer review, Biomedical publishing, Scientific journal publishing, QUALITATIVE RESEARCH, Stakeholder consultation                                                                                                                                                                                                                                                                                     |
|                                 |                                                                                                                                                                                                                                                                                                                                                                                                       |

SCHOLARONE™  
Manuscripts

# Editors' perspectives on the roles and tasks of peer reviewers in biomedical journals: A qualitative study

Ketevan Glonti<sup>1,2</sup>, Isabelle Boutron<sup>2</sup>, David Moher<sup>3</sup>, Darko Hren<sup>1</sup>

<sup>1</sup> University of Split, Department of Psychology, School of Humanities and Social Sciences, Split, Croatia. [kglonti@unist.hr](mailto:kglonti@unist.hr), [dhren@ffst.hr](mailto:dhren@ffst.hr)

<sup>2</sup> Université de Paris, CRESS, INSERM, INRA, F-75004 Paris, France. [isabelle.boutron@aphp.fr](mailto:isabelle.boutron@aphp.fr)

<sup>3</sup> Center for Journalology, Clinical Epidemiology Program, Ottawa Hospital Research Institute, Ottawa, Canada. [dmoher@ohri.ca](mailto:dmoher@ohri.ca)

**Corresponding author:** Ketevan Glonti, Poljička 35, 21000 Split, Croatia, [kglonti@unist.hr](mailto:kglonti@unist.hr)  
**Tel:** +385 976324635

## Abstract

**Objective** Peer reviewers of biomedical journals are expected to perform a large number of roles and tasks, some of which are seemingly contradictory or demonstrate incongruities between the respective positions of peer reviewers and journal editors. Our aim was to explore the perspectives, expectations and understanding of the roles and tasks of peer reviewers of editors from general and specialty biomedical journals.

**Design** Qualitative study

**Setting** Worldwide

**Participants** 56 journal editors from biomedical journals most of whom, were Editor-in-Chiefs (n=39), male (n=40) and worked part-time (n=50) at journals from 22 different publishers.

**Methods** Semi-structured interviews with journal editors were conducted. Recruitment was based on purposive maximum variation sampling. Data were analysed thematically following the methodology by Braun and Clarke.

**Results** Journal editors' understanding of the roles and partly of tasks of peer reviewers are profoundly shaped by each journal's unique context and characteristics including financial and human resources and journal reputation or prestige. There was a broad agreement among editors on expected technical tasks of peer reviewers related to scientific aspects but show different expectations in the level of depth. We also found that most editors support the perspective that authorship experience is key to high-quality reviews while formal training in peer reviewing is not.

**Conclusions** These editors' accounts reveal issues of a social nature within the peer review process related to missed opportunities for journal editors to engage with peer reviewers to clarify the expected roles and tasks.

Further research is needed on actual performance of peer reviewers looking into the content of peer reviewer reports to inform meaningful training interventions, journal policies and guidelines.

**Keywords:** Peer review; Biomedical publishing; Scientific journal publishing; Qualitative research; Stakeholder consultation

## Strengths and limitations of this study

- This study is one of few qualitative studies that explore biomedical journal editors' views regarding the roles and tasks of peer reviewers
- The participants were diverse in terms of characteristics related to the journals
- The majority of the participants were Editor-in-Chiefs, which may limit the generalisability of the results

## Introduction

Peer reviewers of biomedical journals are key stakeholders in the editorial ecosystem, helping authors to improve manuscripts and providing advice to scientific editors on their decision regarding the acceptability of publishing papers. Despite their importance for scientific publishing, fundamental principles such as the roles, tasks and core competencies of peer reviewers – including a minimum standard of knowledge, skills, and characteristics that are needed to effectively deliver high quality reviewer reports – are neither well defined, agreed upon, or formally established (1). While core competencies have been to some degree established for journal editors (2) thus far this is not the case for peer reviewers. A recent scoping review (2019) showed a large number of roles and tasks that peer reviewers of biomedical journals are expected to carry out some of which seem to contradict each other, or displayed incongruities between the position of the peer reviewer and the position of the journal editor (3). These findings were reflected in a study that aimed to identify the tasks that journal editors expect from peer reviewers who evaluate a manuscript reporting a randomised controlled trial, where a substantial disconnect between the expectations of journal editors and peer reviewers was found (4). A mutual understanding of expectations and responsibilities is one of the key factors that determine the quality of reviewer reports and satisfaction of the actors with the review process. However, biomedical journals differ in their guidance provided to peer reviewers, in their publishing capacity and resources available as well as the reviewer pool (5). Therefore, it is likely that editors might have diverging opinions about the roles and tasks peer reviewers are supposed to perform, something that has not been previously explored in depth.

Given that peer review is a social process that goes beyond the quality control of manuscripts (6), qualitative methods may lead to a deeper examination of the complexities of these processes compared to quantitative approaches and provide important context to improve the understanding of different editorial realities and practices.

Our aim was to examine the experience of general and specialty biomedical journal editors and to characterise their perspectives, expectations and understanding of the roles and tasks of peer reviewers.

## Methods

### Study design

We conducted semi-structured interviews with biomedical journal editors from general and specialty journals. The design of the study and reporting of study results were informed by relevant guidance for reporting qualitative research (7). Key methodological components are presented below; a detailed description of the study methodology is available elsewhere (8).

## Patient and Public Involvement

Patients and the public were not involved in the design, or conduct, or reporting, or dissemination of our research. Sampling and recruitment

We used purposive maximum variation sampling (9) to obtain as much diversity in the demographic and journal characteristics of study participants as possible. Interviewees were recruited from multiple sources, including the lead author's professional network within the Methods in Research on Research (MiRoR) project (10); from two publishers, namely, BioMed Central (BMC) and British Medical Journal (BMJ) publishing group; and attendees of the Eighth International Congress on Peer Review and Scientific Publication (11). A total of 543 prospective interviewees were approached via email and 69 editors responded positively to the request. In addition, interviewees were asked to recommend other editors who would potentially be interested in contributing to this study.

Since sample size is irreversibly linked to saturation, which in turn can only be operationalized during data collection (12), our approach to data collection and analysis was iterative. Thus, recruitment continued until saturation – conceptualized as the point at which no new codes and themes were identified from the data – was achieved. After 56 interviews saturation was obtained and no further editors were contacted and interviewed.

## Data collection

All interviews were conducted between October 2017 and February 2018 by the lead author (KG). Interviews were conducted either face-to-face or by telephone to accommodate for the geographical diversity and availability of study participants. They lasted 25–60 minutes.

A topic guide (Additional file 1) was used during the semi-structured interviews. The guide was initially informed by the outcomes of the scoping review (1), and was piloted and further refined over the course of the study, particularly after the first four interviews.

Prospective interviewees were provided with a study consent form and a study information sheet that consisted of information about the researchers, and study information (aim, interview procedures, ethics, confidentiality, funding and contact details). Interviewees were asked to sign a written consent form prior to being interviewed. Before starting the interview, study objectives were reiterated and additional information provided where necessary.

KG was a PhD student at the time of the interviews. She has previously experienced the peer review process in biomedical journals as an author and peer reviewer, and had undergone training in conducting qualitative interviews prior to data collection. She was supervised by DH, who has extensive experience of the peer review process in biomedical journals as an author, peer reviewer and journal editor.

## Analysis

Interviews were transcribed verbatim and fieldnotes were written up after every interview.

All documents were then imported into NVivo V.12 and subjected to thematic analysis as described by Braun and Clarke (13) and outlined in the protocol (8). In summary, a preliminary codebook was generated by two researchers (KG and DH) independently from a subset of six interviews (14) using both, deductive codes from topics in the interview guide and inductive content-driven codes. The remaining 50 interviews were coded by the lead researcher (KG), supervised by DH through regular meetings. In line with the iterative process of data collection and analysis, interviews were analysed in the order in which they were conducted. To assess saturation, the lead researcher documented the

process of code development, updating the codebook after analysing each transcript. Saturation was achieved after 56 interviews.

To establish trustworthiness in this research, the step-by-step approach proposed by Nowell et al., which provides a detailed description of how to conduct a trustworthy thematic analysis, was followed (15). This approach used criteria for trustworthiness in qualitative research proposed by Lincoln and Guba (16) and shows how these can be achieved throughout the six phases of thematic analysis. The methodological techniques that we undertook to ensure a trustworthy analysis throughout our study are presented in Additional file 2.

## Results

A total of 56 biomedical journal editors were interviewed (Table 1). Of these, the majority were male Editor-in-Chiefs who were based in 21 different countries. Most editors worked part-time at their respective journals, which were mainly specialty journals. Most journals employed a single-blind review process. Most interviewees were editors of journals that are published through commercial publishers.

**Table 1** Sample characteristics

| <b>Demographic characteristics</b>      |                                                                                                                                  |
|-----------------------------------------|----------------------------------------------------------------------------------------------------------------------------------|
| <b>Sex</b>                              | Female (n=16), Male (n=40)                                                                                                       |
| <b>Position</b>                         | Junior Editor (n= 1), Senior/Associate Editor (n=11), Co-Editor-in-Chief (n=4), Editor-in-Chief (n=39), Editorial Director (n=1) |
| <b>Commitment</b>                       | Part-time (n=50), Full-time (n=6)                                                                                                |
| <b>Geographic location</b>              | Asia (n=2), Africa (n=1), North America (n=19), South America (n=3), Europe (n=28), Oceania (n=3)                                |
| <b>Journal characteristics</b>          |                                                                                                                                  |
| <b>Journal specialty</b>                | General medicine and Mega journals* (n=13), Specialty (n=43)                                                                     |
| <b>Indexing status**</b>                | Yes (n=53) No (n=3)                                                                                                              |
| <b>COPE Membership***</b>               | Member (n=27), Not a member (n=29)                                                                                               |
| <b>Peer review model</b>                | Single-blind (n= 38), Double-blind (n=7), Triple-blind (n=1), Open peer review (n=9), Post-publication (n=1)                     |
| <b>Open access, Subscription, Mixed</b> | Open access (n=35), Subscription (n=4), Mixed (n=17)                                                                             |
| <b>Publishers</b>                       | Academic (n=9), Commercial (n=34), Mixed model**** (n=13)                                                                        |

\*A peer-reviewed academic open access journal designed to be much larger than a traditional journal by exercising low selectivity among accepted articles.

\*\* Refers to indexing status on MEDLINE, Scopus and Web of Science

\*\*\* COPE – Refers to the Committee on Publication Ethics

\*\*\*\* Refers to journals that are either co-owned by medical societies and commercial publishers, or owned entirely by medical societies but operated through a commercial publisher

An overview of the different domains within our two themes: Roles of peer reviewers and Tasks of peer reviewers are presented in Additional file 3.

## Roles of peer reviewers

Journal editors outlined a variety of roles, which coalesced around four domains. Peer reviewers should be: (1) Proficient experts in their field qualified to peer review; (2) Dutiful towards scientific community vs volunteers who deserve recognition; (3) Professionals; and (4) Advisors to the editor

### **Peer reviewers should be 'Proficient experts in their field qualified to peer review'**

There was agreement among editors that peer reviewers are experts in their field when they: (1) have expertise and demonstrate high-level knowledge in their subject area; (2) are up to date with existing evidence and practice guidelines; and (3) have experience of publishing their own research. However, there was substantial disagreement on how these criteria are defined and understood, and how 'expertise' is operationalized.

One common narrative was that qualified peer reviewers are "experienced authors" who have a strong reputation and publication record in "high-impact journals". Concurrently, a number of editors linked the quality of the peer review report with the reviewers' writing and analytical skills, which they believed are gained through extensive authorship in their field. In their view, authorship hones both writing and reviewing ability, since authors are theoretically able to learn from review reports on their own submitted manuscripts:

*"You learn by doing and if you have published let's say 200 articles then normally you are also a good reviewer... and if you are a bad author of manuscripts then you are a bad reviewer. And your opinion leaders are the sought after reviewers because they know the field and can write well and can also analyse a manuscript from another author quite well."* (Editor-in-Chief, specialty journal).

Interviewees also indicated that they had a preference for seasoned authors and opinion leaders in the field over junior researchers. Here, their main concern was about fulfilling authors' expectations of an objective peer review by recruiting an expert to review their manuscript:

*"Well first of all I think our reviewers ... are seasoned, they have to be experts, I mean otherwise why are they reviewing? That is not fair to the author."* (Co-editor-in-Chief, specialty journal)

However, several editors commented that the actual level of expertise needed to deliver a high quality review report does not necessarily depend on publication record and seniority level. Some editors considered reviewing to require a different type of skillset that is not necessarily developed through writing or present by default. Other key factors drive review quality, such as "dedication of sufficient time" and "hands on experience with the methods used". This is often the case with junior researchers, who go through an active learning experience of applying methods for their own research and receiving feedback on their work. Less experienced researchers' greater motivation to peer review was also mentioned as a major driver of high-quality reviewer reports. For these reviewers, receiving the invitation to review is in itself a confirmation of growing personal reputation and recognition by the journal, and by the broader scientific community. At the same time, their supposed lack of self-

1  
2  
3 confidence due to their current low career status/standing within the scientific field could also drive  
4 the delivery of high-quality reviewer reports, in a desire to establish and maintain their status within  
5 the scientific community:  
6

7 *"I will say that junior faculty and post doctorate fellows often write the best reviews*  
8 *because they tend to be insecure and tend to over-compensate and to be very careful in*  
9 *doing a good job."* (Editor-in-Chief, specialty journal).  
10

11 In the same vein, a number of editors from non-high ranking journals commented that senior  
12 reviewers' increasing scientific status and "self-regard" might lead to declining review report quality,  
13 most commonly demonstrated by the "lack of detailed comments" or "two-line" review reports that  
14 did not aim to help "to improve a manuscript", but only to judge publication potential. That being said,  
15 "experienced" peer reviewers were still highly sought after by all interviewees. Since they typically  
16 receive a high volume of reviewer requests, journal editors suspect that they prioritize their reviewing  
17 time in favour of highly ranked journals, a behaviour that multiple journal editors reported practicing  
18 themselves when asked to perform a peer review. Although the least experienced reviewers are  
19 generally more available, most editors feel that they lack the degree of experience required to conduct  
20 a good peer review and "focus excessively on technical details", instead of the "bigger picture" that  
21 more experienced reviewers are able to provide.  
22  
23

24  
25 Regardless of preference for the type of peer reviewer, the vast majority of interviewees – except for  
26 those editors working for high-ranking journals - acknowledged that it is hard to solicit peer reviewers  
27 in general, particularly experienced ones:  
28

29  
30 *"And one of the things that we face is that we have on one side younger investigators,*  
31 *willing to do the job. Sometimes they lack you know, the view and then you will have the*  
32 *very established scientist who in most cases do refuse to make reviews. And so we have to*  
33 *balance out ...these two extremes."* (Editor-in-Chief, specialty journal).  
34  
35

36 Lastly, whilst peer reviewers were expected to fulfil the above outlined criteria to some degree,  
37 interviewees did not consider the completion of a training or a course on peer reviewing as a  
38 prerequisite or necessary qualification to become a peer reviewer. All interviewees stated that they  
39 learnt to peer review manuscripts "by just doing it", without having had previous training, and  
40 suggested that this was also the case for the majority of the peer reviewers in biomedical journals.  
41 Editors explained how one way of honing reviewing skills is through indirect feedback and comparisons  
42 with fellow reviewers' reports (i.e. operationalized through comparing their own feedback with that  
43 of other peer reviewers for the same manuscript); and through the final decision taken by the Editor-  
44 in-Chief on the fate of the manuscript.  
45

46  
47 *"We also tried to train our reviewers in an indirect way that is when a decision was*  
48 *completed and when we send the decision letter to the author we usually carbon copy the*  
49 *decision along with the comments of all the reviewers to all the reviewers so that every*  
50 *reviewer can see and compare their comments, their own comments with the comments*  
51 *of other reviewers and that would be a form of training for them."* (Editor-in-Chief,  
52 specialty journal).  
53  
54

55 There was a division of opinions on the usefulness of courses that aim to teach peer reviewing skills.  
56 While several editors were receptive to the idea, others felt that they could only be useful to less  
57 experienced researchers because they can only teach about the technicalities of the process and  
58 cannot replace experience gained over time:  
59  
60



1  
2  
3 *"I learnt on the field. First, as an author and then, you know, when I become more*  
4 *established a scientist, as a reviewer it is a long process, and difficult process... [with]*  
5 *courses, you can learn the technicalities of the process but you know experience is very*  
6 *relevant... courses do not help established scientists, they may help young scientists but*  
7 *the courses won't give them experience in actually in the field."* (Editor-in-Chief, specialty  
8 journal).  
9

### 11 **Peer reviewers should be 'Dutiful towards scientific community vs. volunteers who deserve** 12 **recognition'**

14 The majority of interviewees repeatedly expressed their gratitude towards peer reviewers, whom they  
15 most commonly framed as "volunteers" who perform peer review out of "altruistic motives". Being  
16 occasional reviewers themselves, editors were well aware of the many competing duties of peer  
17 reviewers in the biomedical field - including research, teaching and/or clinical responsibilities –  
18 between which reviewing has to be squeezed in. Many interviewees emphasised that reviewing is  
19 "time consuming" and repeatedly described it as an "unpaid" and largely "unrecognised" role:  
20

21  
22 *"...Most of the work that is done on journals is uncompensated, and ... you are already*  
23 *dealing with people who are very busy people in their professional lives, and so you are*  
24 *really asking them to do things at nights and weekends for which they get really very little*  
25 *recognition. And very little compensation if any."* (Editor-in-Chief, specialty journal).  
26

27 Given that the majority of editors face difficulties finding peer reviewers, several considered peer  
28 reviewers to be a "precious resource" that needs to be treated with "care". Interviewees reported  
29 doing so through: (1) careful screening of submissions to ensure that only sufficiently good-quality  
30 manuscripts are forwarded to peer reviewers (2) not overburdening good peer reviewers with too  
31 many invitations; and (3) provision of recognition and rewards. Several recognition and reward  
32 schemes were mentioned, which can be broadly divided into two categories: (1) Financial rewards  
33 (free access to journal/publication discount) and small tokens of appreciation (e.g. mugs, books); and  
34 (2) Rewards aimed at boosting career progress through official professional development (e.g.  
35 Continuing Medical Education (CME) points; official letters for Continuing Professional Development  
36 (CPD); and through journal rewards aimed at enhancing peer reviewers' visibility, reputation and  
37 credibility within the scientific community (e.g. being invited to become editors and/or editorial board  
38 members, names published on journal website, invitations to social events).  
39

40 In contrast to the more common perception of reviewers as "volunteers", a small number of editors  
41 commented that peer reviewers should consider the act of peer reviewing to be a "responsibility",  
42 "duty" and "obligation to their field" and to the scientific community in general. In their view, the  
43 entire process relies on - and only works because of - the principle of reciprocity and researchers  
44 perpetuating the development of the own research community. In their view, reciprocity should be a  
45 strong motivational drive for peer reviewers:  
46

47  
48 *"Those of us who have a track record in publication get solicited for doing an awful lot of*  
49 *reviewing and you have got to fit that in around your other time and you are doing it*  
50 *because the process is important and you want your next paper to get properly reviewed*  
51 *so you want to peer review the paper that you have been sent."* (Interim Editor-in-Chief,  
52 specialty journal).  
53

54 A few editors were more critical of the rationale for reviewing "for free", suggesting that the concept  
55 of duty in peer reviewing had originally been coined and continued to be fostered by publishers for  
56 profit-making purposes, and is now dated:  
57

1  
2  
3 *"I mean they... they say this is your duty, you know it is your duty as a scientist to, you*  
4 *know, do these things ... and give back, but ... really the journals ... certainly are profiting*  
5 *now the authors are paying pretty good page charges, the reviewers aren't getting paid,*  
6 *and you know this could be an issue."* (Editor-in-Chief, specialty journal).  
7

### 9 **Peer reviewers should be 'Professionals'**

10 There was general agreement on the need for reviewers to be: (1) Unbiased and ethical professionals;  
11 (2) Reliable professionals; (3) Skilled critics  
12

13  
14 Editors outlined three aspects related to their expectation that peer reviewers should be 'unbiased  
15 and ethical professionals' consistent with 'scientific ideals'. These were: (1) being "fair" and "objective"  
16 (i.e. peer reviewers are expected to evaluate and judge manuscripts in a fair and objective manner);  
17 (2) "maintain confidentiality" (i.e. peer reviewers are expected keep manuscript content confidential  
18 avoiding disclosure to others); and (3) "declare/avoid potential or actual conflict of interest". Editors  
19 emphasized the importance of the latter most frequently. Some editors explained that conflict of  
20 interest could potentially contribute to increased review quality but stressed that transparency is key.  
21 They emphasized their own position as "decision makers" within the peer review process to assess and  
22 decide whether the reported conflict of interest is prohibiting a fair and objective assessment.  
23

24  
25 Editors also unanimously agreed that peer reviewers should be 'reliable professionals' who should  
26 "respond promptly to peer reviewer requests". They should either accept or decline, but not "ignore  
27 the invitation to review", which is the more common frustrating practice reported by interviewees  
28 from non-high ranking journals. The common understanding among all editors was that a good peer  
29 reviewer report takes a substantial amount of time to be written, something that peer reviewers  
30 should be aware of prior to accepting. They should be willing to devote sufficient time and attention  
31 to the evaluation of manuscripts yet deliver the reviewer report within the agreed timeline out of  
32 "respect" and "fairness" to authors, to the journal and the publisher.  
33  
34

35  
36 Lastly, the majority of interviewees considered helping authors to "improve their manuscript" to be  
37 the primary purpose of the peer reviewer, not to suggest a rejection or to "filter it out". Therefore, the  
38 need for reviewers to be 'skilled critics' was explicitly and implicitly voiced throughout the interviews.  
39 As part of the improvement role, it was expected that peer reviewers provide "constructive criticism  
40 embodying specific and addressable comments". Peer reviewers were also expected to be "thorough  
41 and detailed" and to "systematically address every aspect of the manuscript". Another aspect  
42 emphasised by interviewees was the need for an "evidence-based review", where peer reviewers'  
43 statements should be "supported by references" that aid the author and guide the editor.  
44

45 Editors expected peer reviewers to be 'respectful communicators'. They outlined basic principles of  
46 courtesy such as "respect for the work of the authors". Peer reviewers were expected to provide  
47 comments that "serve a scientific purpose" whilst keeping in mind that they are criticising the  
48 manuscript, not the authors. Appropriate communication was deemed to be crucial. Based on editors'  
49 accounts that peer reviewers should be "kind" and offer "positive" comments to nurture and  
50 "encourage" authors to improve their work, it became evident that peer reviewing should go beyond  
51 the mere technical assessment of manuscripts, and thus has also a supportive role:  
52  
53

54  
55 *"I often think the peer reviewers are incredibly negative, and they rarely have anything*  
56 *positive to say. And I tend to feel, you know if somebody was reviewing my manuscript I*  
57 *would want them to try to say at least one tiny little positive thing about what I have*  
58 *done."* (Editor-in-Chief, specialty journal)  
59  
60

### Peer reviewers should be 'Advisors to the editor'

Editors were explicit in their attribution of a primarily "advisory role" to peer reviewers. Our interviewees perceived and stressed their own role as the "ultimate decision makers" who take decisions based on the sum of the factors outlined above. They have the authority to "override peer reviewers recommendations" and "ignore their opinion" if necessary thereby directly or indirectly exerting influence on authors to modify their manuscripts:

*"...the peer reviewer is really playing an advisory role to the editors...it's only the editors that make a decision on whether to accept or not and how they want the paper to be written."* (Editor-in-Chief, specialty journal).

Editors made it clear that decision-making within the editorial process is shaped and influenced by the interplay of a complex web of factors, including: (1) the editors' own expert knowledge and ability to assess different aspects of manuscripts; (2) peer reviewer reports; (3) authors' replies; (4) discussions between editors and editorial board members during manuscript meetings where manuscripts considered for publication are discussed; (5) the number and type of submissions received; (6) the strategic approach of the journal; (7) consideration of readership, and (8) subjects related to publishers. Thus, while peer reviewer reports play a key part, they are not the only element within the equation. While scientific quality and value of submitted manuscripts were at the foreground, interviewees were largely open about the influence of other non-scientific factors that play into their decision making process. Nevertheless, the peer reviewer report was consistently regarded as a key pillar supporting publication decisions, including peer reviewers' advisory role of providing the editor with a "recommendation on the fate of the manuscript". With few exceptions, most editors reported that their journal submission systems ask peer reviewers to indicate whether the manuscript should be accepted (with major/minor revisions) or rejected:

*"...the most important thing for me is actually at the end, the advice to reject the paper or have it revised."* (Editor-in-Chief, specialty journal).

Most editors were open about the substantial influence of peer reviewer recommendations on their decision-making. This was rationalized in a variety of ways, which often co-exist. Editors partly deferred their decision to peer reviewers when they felt uncertain about their own knowledge and ability to assess the manuscript adequately, referring to the "trust" they extend towards experts in the field to help in decision-making. Ticking the recommendation box was also useful to justify editorial decisions to authors when the peer reviewer report did not convey a clear direction for the manuscript, and the editor wants them to "come off the fence". Many editors reported deferring to additional peer reviewers in case of disagreements between the initially selected peer reviewers - described as a common occurrence. Another problematic aspect of the recommendation function was the lack of a common understanding of what the individual recommendation categories actually mean. Since this is a subjective recommendation, there are inherent variations in reviewers' views.

### Peer reviewer tasks

Editors outlined a number of tasks which coalesced around four domains: (1) Organisation and approach to reviewing; (2) Make general comments; (3) Assess and address content for each section of the manuscript; and (4) Address ethical aspects.

### Organisation and approach to reviewing

1  
2  
3 At the beginning of the reviewer report editors prefer to see a “summary of the key points” of the  
4 manuscript, which functions as a ‘quality check’ for editors “to be confident that they [the peer  
5 reviewers] have read it and understood it [the manuscript]”. The majority of editors expect reviewers  
6 to provide a balanced view by identifying both “strengths and weaknesses of the manuscript”. Editors  
7 also expect peer reviewers to “identify flaws” and differentiate between “fatal and addressable flaws”  
8 in order to understand and assess whether the manuscripts could be improved. Furthermore, a  
9 number of editors suggested that it is helpful to differentiate between “major and minor comments”.  
10 It became evident that the approach to peer review is mostly aimed at helping editors in their decision  
11 making process.  
12  
13

### 14 15 **Make general comments**

16 Editors specified that they expect to see some general and overarching comments that provide an  
17 “overall picture” of the “importance and significance” of the manuscript as well as “relevance to field  
18 and (clinical) practice”. Additional comments should focus on the general aspects of “validity”,  
19 “quality”, “technical merit” and “rigor”. The assessment of “novelty” and “originality” was mentioned  
20 by a number of editors, however there was a clear divide between high-ranking journals and other  
21 journals – with editors from the latter repeatedly acknowledged that manuscripts with “novel findings”  
22 tend to be preferentially submitted to high-ranking journals.  
23  
24

### 25 26 **Assess and address content for each section of the manuscript**

27 The majority of editors expected peer reviewers to thoroughly appraise the content of each manuscript  
28 section. The “soundness of the methodology used” was most frequently mentioned by peer reviewers.  
29 Generally, the level of detail expected of peer reviewers seemed to differ according to the resources  
30 that journals had as well as the editors’ own abilities. While this was oftentimes implicit, it was  
31 apparent in the example of ‘statistics’. For example, while a number of journals reported to employ a  
32 “statistical review by default” other had to rely heavily on peer reviewers for that to supplement their  
33 own limitations:  
34  
35

36 *“...bringing expertise such as looking at the statistical analysis which is not my strong point*  
37 *at all. So bringing that sort of expertise to it.” (Co-Editor-in-Chief, specialty journal).*  
38  
39

40 Another aspect that was repeatedly mentioned was the focus on ‘spin’ in the discussion/conclusion  
41 section. Although not explicitly named as ‘spin’ editors want peer reviewers to look out for any “claims  
42 that are not supported by the results”, “overenthusiasm” and “extrapolation”.  
43  
44

### 45 46 **Address ethical aspects**

47 Editors reported that their submission systems typically offers two text boxes to peer reviewers – one  
48 for comments to the authors and the other one for confidential comments to the editors. The latter  
49 should be used by peer reviewers to advise the editor on any aspects related to “ethics” and ‘research  
50 integrity’ such as suspicion of research misconduct and detrimental and questionable research  
51 practices. The confidential comments are a means of avoiding any potential conflict arising from such  
52 criticism between authors and reviewers.  
53  
54

## 55 56 **Discussion**

57 This study provided an in-depth, behind-the-scenes account of 56 editors’ experiences with, and  
58 expectations towards, peer reviewers. We found that journal editors’ understanding of the roles and  
59 tasks of peer reviewers are profoundly shaped by each journal’s unique context and characteristics,  
60

1  
2  
3 including financial and human resources and journal reputation. Thus, in line with existing literature,  
4 we found that editorial decision-making and expectations towards peer reviewers are unavoidably  
5 shaped by social externalities that at times may have little to do with scientific content of the  
6 manuscript (6,17). We found that the majority of our interviewees gave considerable importance to  
7 the reviewers' recommendations function, despite concerns regarding the lack of a commonly agreed-  
8 upon definition of the available options, frequent disagreement among peer reviewers (18) and  
9 existing bias (19). Given these limitations, editors should seriously consider removing the reviewers'  
10 'recommendations function', where they are expected to provide the editor with their  
11 recommendation regarding the article's suitability for publication. This is in line with existing research  
12 on relationship between external reviewers' recommendations and the editorial outcome of  
13 manuscripts (20). This would help to realign the role of peer reviewers as 'advisors' rather than convey  
14 the idea that they are decision makers. It would also help to delete some of the existing malleable  
15 boundaries of authority and responsibility on the review process placing the editor in the sole decision  
16 maker position. Considerable efforts should be made to communicate to peer reviewers to place their  
17 focus on the evaluation of strengths and weaknesses, major and minor flaws of manuscripts across  
18 multiple dimensions and suggestions for improvement. Furthermore, editors should encourage peer  
19 reviewers to refer to appropriate reporting guidelines to ensure the completeness of information  
20 provided by authors in their studies. One way of achieving this could be through provision of feedback  
21 to peer reviewers by editors i.e. editors could send follow-up emails to peer reviewers requesting  
22 clarification of any missing points. This is time consuming, but might help to improve peer reviewer  
23 reports.

24  
25  
26  
27  
28 Furthermore, although we found considerable agreement among editors concerning technical tasks of  
29 manuscript reviewing, there was an apparent difference in editors' expectations of the level of depth  
30 and detail they would like to see in a reviewer report. Our study sample showcases the status quo of  
31 the editors' market, where there are a few full-time journal editors. The remainder work on a part time  
32 basis, usually for a symbolic or stipend-like payment, and combine their editorial responsibilities with  
33 research, education, and/or clinical duties. Therefore, it might be the case that their own limited time  
34 might lead to expectations of greater detail from reviewers. Journal resource availability might also  
35 have an impact on their expectations, such as requests for comments related to statistical analysis in  
36 the case of journals with fewer resources. Given these existing contextual journal differences and  
37 hence peer review report requirements, better ways of communicating editorial expectations to peer  
38 reviewers (who might review for different journals having different expectations) are needed.  
39 Currently, these expectations are communicated through publishers' and journal-specific guidelines.  
40 However, various studies in this area suggest that these are often not readily available, or are generic  
41 and non-specific (21) and thus do not properly convey expectations.

42  
43  
44  
45  
46  
47 Another key finding was interviewed editors' apparent lack of appreciation of the importance of formal  
48 peer reviewer training. The majority embraced a somewhat simplistic and 'linear' view that 'good'  
49 authors (i.e. usually defined as authors with extensive authorship in prestigious journals) make 'good'  
50 peer reviewers. However, there is no evidence to support this perspective; evidence linking authorship  
51 experience and academic qualifications to high-quality reviews is very limited. The only substantial  
52 study in this field was unable to predict reviewer performance from easily identifiable types of  
53 experience or qualifications. The study authors also found, contrary to the beliefs prevalent among our  
54 interviewees, that factors such as academic rank and seniority do not predict performance (22). In fact,  
55 studies that have attempted to determine whether some combination of peer reviewer experience  
56 could predict the quality of their subsequent reviews found that the highest-rated reviewers tended  
57 to be young, and that the quality of peer review did not correlate with academic rank (23–26).  
58 However, most of these studies were relatively limited in size, were a sub-analysis of a study of some  
59  
60

1  
2  
3 other intervention, and are more than 20 years old; hence, the evidence base for this finding is limited.  
4 Thus far, in the absence of additional research demonstrating the contrary, there are no criteria that  
5 predict good peer reviewer performance.

6 Given this situation, we believe that the skillset required to be a good author is not necessarily the  
7 same as that required to be a good peer reviewer. In a recent study (2019) by Superchi et al. that  
8 systematically reviewed tools used by journal editors to assess the quality of peer review reports, the  
9 authors identified nine quality domains pertaining to peer reviewer skills, of which five (i.e.  
10 relevance and originality of the study, interpretation of study results, strength and weaknesses,  
11 manuscript presentation and organisation) arguably overlap with the skillset of authors. The remainder  
12 are directly concerned with skills related to structure and delivery of the peer review report (27), which  
13 we believe may not automatically follow from being a prolific author. Therefore, we propose that the  
14 following four domains can, and in principle should, be taught to prospective reviewers: (1) structure  
15 of the reviewer's comments; (2) characteristics of reviewer's comments including concepts such as  
16 clarity, constructiveness, detail/thoroughness, fairness, knowledgeable and tone; (3) timeliness of  
17 the review report; and (4) usefulness of the review report to editorial decision-making and manuscript  
18 improvement. Thus, it appears that helping to improve the manuscript not only entails providing  
19 specific and detailed comments about scientific aspects of the manuscript, but also comments that  
20 empower and motivate authors – a skill that is closely aligned to the supportive function of peer  
21 reviewers that also emerged from our study.

22 Notwithstanding various surveys on educational needs of young clinicians and researchers across  
23 different biomedical fields having revealed a strong interest in attaining better reviewing skills (28),  
24 such training is still not commonly included in biomedical postgraduate education programmes. At the  
25 same time, existing educational interventions have shown underwhelming results, and their wider  
26 applicability remains questionable due to their relatively poor methodological quality (29).

27 Given this lack of evidence we think it would be helpful to conduct research on the actual content of  
28 peer reviewers' reports to help establish educational needs for peer reviewing (30).

29  
30  
31 According to the majority of our interviewees, it is becoming increasingly difficult to find experienced  
32 authors to review manuscripts. On the other hand, junior researchers are often more willing to accept  
33 invitations, including from lower-ranking journals. This is in line with existing evidence (31) and is likely  
34 to be due to differing levels of motivation (32). Thus, there is an opportunity for acknowledging that  
35 the breadth and variety of reviewing roles and tasks may require a more granular approach by editors  
36 when assigning peer reviewers to a manuscript. Achieving a balance of senior and junior reviewers  
37 would cater to their wide range of reviewing motivations, as well as to their individual expertise. At  
38 the same time, the question of how to attract this ideal mix of reviewers remains. The rewards and  
39 incentives offered by most journal editors among our sample are likely to be more attractive for junior  
40 peer reviewers than senior reviewers. Based on editors' comments on the lack of effectiveness of the  
41 provided incentives and the general difficulty to get peer reviewers to accept invitation across the  
42 biomedical field (33,34) and offering higher-level rewards is key. For example, the majority of  
43 reviewers are affiliated to academic institutions, which are therefore critical stakeholders in the peer  
44 review process. If peer reviewing is incentivized and rewarded as part of one's academic career  
45 advancement, it is likely to be as important - if not more important - than whatever journals can offer.  
46 For example, the University of Glasgow (35) has started rewarding peer reviewer and editorial  
47 responsibilities as a core requirement for academic promotion and achieving tenure. However, this is  
48 the only example we were able to identify. The peer review process is part of the social infrastructure  
49 of research (36), therefore it is the responsibility of all actors to contribute to better research.  
50 Academic institutions and other stakeholders such a funders can play a key role to implement  
51 alternative measures of research quality (37) and a stronger focus on research quality.

## Limitations

Our recruitment approach gave rise to a key limitation of this study. Based on our collective experience as researchers and a former staff member of a biomedical journal (DH) that struggled with response rates involving studies with editorial staff, we anticipated that it would be challenging to recruit journal editors to participate in our research. The majority of journal editors of biomedical journals are part-timers who concurrently work as practitioners, researchers, educators and may have other additional roles. In the light of this situation, our employment of purposive maximum variation sampling resulted in predominant contact with Editors-in-Chief. While one of the strengths of this study is that research participants were diverse in terms of demographic characteristics and characteristics related to their journal (Table 1), two thirds of participants had this role within their respective journal. Although the lead researcher asked potential interviewees either to participate themselves or to recommend suitable journal colleagues who could be contacted in their stead, it is likely that this approach led to the relative homogeneity of our study sample. This may limit the generalisability of the results due to the limited representation of other editorial staff members involved in the peer review process. Our insights from the interviews and wider author and team experiences suggest that Editors-in-Chief might primarily be responsible for higher-level tasks around the journal, and possibly be less involved in the direct communication process with authors and peer reviewers. Therefore, there is a need to explore whether the involvement of editorial staff in other positions would have produced convergent or divergent findings.

## Conclusion

This study provides context for, and details about, the roles and tasks of peer reviewers in biomedical journals and helps to explain attitudes and opinions expressed in existing surveys of editors, reviewers and authors on the peer review process. Our research provides a greater understanding of the current status quo of the review process and why particular issues arise around roles and tasks of peer reviewers, and offers insight into how these issues can be addressed.

Further research is needed on actual performance of peer reviewers looking into the content of peer reviewer reports on a large scale to inform meaningful training interventions and to improve existing journal policies and guidelines.

## Footnotes

**Contributors:** All authors have made substantive intellectual contributions to the development of this manuscript. KG and DH jointly contributed to study conception and design. While KG led data collection, analysis and writing of the manuscript DH led the supervision of all these steps. IB and DM have contributed to the writing of the manuscript and approved the final manuscript.

**Funding:** This project was supported by the European Union's Horizon 2020 research and innovation programme under the Marie Skłodowska-Curie grant agreement No 676207.

**Competing interests:** KG and DM had an advisory role with Publons Academy. At the time of data collection for this study KG conducted a secondment at the BMJ. The remaining author (DH) declares no competing interests.

**Patient consent:** Not applicable.

**Ethics approval:** This project has been evaluated and approved by the University of Split, Medical School Ethics Committee. Ethical approval (Reference number 2181-198-03-04-17-0029) was granted in May 2017. Prospective interviewees were provided with a study consent form and a study information sheet. Interviewees were asked to sign a written consent form prior to being interviewed. Copies of the invitation letter, information sheet, and consent form are available from the leading author (KG).

**Data sharing statement:** The data generated and/or analysed in the study are not publicly available due to participant anonymity, but may be available from the corresponding author on reasonable request that includes a study protocol, ethical approval and data use agreement.

**Acknowledgements:** The authors would like to thank Dr Sara Schroter (BMJ) and Dr Elizabeth Moylan (BMC) for providing guidance and help on the recruitment strategy of interviewees. We also would like to thank the publishers and all study participants. We would also like to express our thanks to Alice Biggane (PhD candidate on the MiRoR project) for her help in reviewing this manuscript prior to submission.

## References

1. Glonti K, Cauchi D, Cobo E, Boutron I, Moher D, Hren D. A scoping review protocol on the roles and tasks of peer reviewers in the manuscript review process in biomedical journals. *BMJ Open*. 2017 Oct 1;7(10):e017468.
2. Moher D, Galipeau J, Alam S, Barbour V, Bartolomeos K, Baskin P, et al. Core competencies for scientific editors of biomedical journals: consensus statement. *BMC Med*. 2017 Sep 11;15(1):167.
3. Glonti K, Cauchi D, Cobo E, Boutron I, Moher D, Hren D. A scoping review on the roles and tasks of peer reviewers in the manuscript review process in biomedical journals. *BMC Med*. 2019 Jun 20;17(1):118.
4. Chauvin A, Ravaud P, Baron G, Barnes C, Boutron I. The most important tasks for peer reviewers evaluating a randomized controlled trial are not congruent with the tasks most often requested by journal editors. *BMC Med*. 2015;13(1):1.
5. Gasparyan AY, Kitas GD. Best peer reviewers and the quality of peer review in biomedical journals. *Croat Med J*. 2012 Aug;53(4):386–9.
6. Lipworth WL, Kerridge IH, Carter SM, Little M. Journal peer review in context: A qualitative study of the social and subjective dimensions of manuscript review in biomedical publishing. *Soc Sci Med* 1982. 2011 Apr;72(7):1056–63.
7. Tong A, Sainsbury P, Craig J. Consolidated criteria for reporting qualitative research (COREQ): a 32-item checklist for interviews and focus groups. *Int J Qual Health Care*. 2007 Dec 1;19(6):349–57.
8. Glonti K, Hren D. Editors' perspectives on the peer-review process in biomedical journals: protocol for a qualitative study. *BMJ Open*. 2018 Oct 1;8(10):e020568.
9. Patton M. *Qualitative Research and Evaluation Methods* , 209-339. 2002;



10. Projet MiRoR | An innovative and ambitious joint doctoral training programme [Internet]. [cited 2017 May 2]. Available from: <http://miror-ejd.eu/>
11. Rennie D, Flanagan A, Godlee F, Bloom T. The Eighth International Congress on Peer Review and Biomedical Publication: A Call for Research. *JAMA*. 2015 May 26;313(20):2031–2.
12. Sandelowski M. Sample size in qualitative research. *Res Nurs Health*. 1995 Apr 1;18(2):179–83.
13. Braun V, Clarke V. Using thematic analysis in psychology. *Qual Res Psychol*. 2006;3(2):77–101.
14. Guest G, Bunce A, Johnson L. How many interviews are enough? An experiment with data saturation and variability. *Field Methods*. 2006;18(1):59–82.
15. Nowell LS, Norris JM, White DE, Moules NJ. Thematic Analysis: Striving to Meet the Trustworthiness Criteria. *Int J Qual Methods*. 2017;16(1):1609406917733847.
16. Lincoln Y, Guba E. *Naturalistic inquiry*. Newbury Park. 1985;
17. Dickersin K, Ssemanda E, Mansell C, Rennie D. What do the JAMA editors say when they discuss manuscripts that they are considering for publication? Developing a schema for classifying the content of editorial discussion. *BMC Med Res Methodol*. 2007 Sep 25;7:44.
18. Rothwell PM, Martyn CN. Reproducibility of peer review in clinical neuroscience - Is agreement between reviewers any greater than would be expected by chance alone? *Brain*. 2000 Sep;123:1964–9.
19. Lee CJ, Sugimoto CR, Zhang G, Cronin B. Bias in peer review. *J Am Soc Inf Sci Technol*. 2013 Jan 1;64(1):2–17.
20. Kravitz RL, Franks P, Feldman MD. Editorial peer reviewers' recommendations at a general medical journal: are they reliable and do editors care? *PLoS One* [Internet]. 2010;5. Available from: <http://dx.doi.org/10.1371/journal.pone.0010072>
21. Hirst A, Altman DG. Are Peer Reviewers Encouraged to Use Reporting Guidelines? A Survey of 116 Health Research Journals. *PLOS ONE*. 2012 Apr 27;7(4):e35621.
22. Callaham ML, Tercier J. The Relationship of Previous Training and Experience of Journal Peer Reviewers to Subsequent Review Quality. *PLOS Med*. 2007 Jan 30;4(1):e40.
23. Kliever MA, Freed KS, DeLong DM, Pickhardt PJ, Provenzale JM. Reviewing the reviewers: comparison of review quality and reviewer characteristics at the American Journal of Roentgenology. *AJR Am J Roentgenol*. 2005 Jun;184(6):1731–5.
24. Evans AT, McNutt RA, Fletcher SW, Fletcher RH. The characteristics of peer reviewers who produce good-quality reviews. *J Gen Intern Med*. 1993;(8):422–8.
25. Stossel TP. Reviewer status and review quality: Experience of the Journal of Clinical Investigation. 1985;

- 1
- 2
- 3 26. Black N, Rooyen S, Godlee F, Smith R, Evans S. What makes a good reviewer and a
- 4 good review for a general medical journal? JAMA [Internet]. 1998;280. Available from:
- 5 <http://dx.doi.org/10.1001/jama.280.3.231>
- 6
- 7 27. Superchi C, González JA, Solà I, Cobo E, Hren D, Boutron I. Tools used to assess the
- 8 quality of peer review reports: a methodological systematic review. BMC Med Res
- 9 Methodol. 2019 Mar 6;19(1):48.
- 10
- 11 28. Rodríguez-Carrio J, Putrik P, Sepriano A, Moltó A, Nikiphorou E, Gossec L, et al.
- 12 Improving the peer review skills of young rheumatologists and researchers in
- 13 rheumatology: the EMEUNET Peer Review Mentoring Program. RMD Open. 2018 Feb
- 14 1;4(1):e000619.
- 15
- 16 29. Bruce R, Chauvin A, Trinquart L, Ravaud P, Boutron I. Impact of interventions to
- 17 improve the quality of peer review of biomedical journals: a systematic review and meta-
- 18 analysis. BMC Med. 2016;14(1):85.
- 19
- 20 30. Lee CJ, Moher D. Promote scientific integrity via journal peer review data. Science. 2017
- 21 Jul 21;357(6348):256–7.
- 22
- 23 31. Casnici N, Grimaldo F, Gilbert N, Squazzoni F. Attitudes of referees in a
- 24 multidisciplinary journal: An empirical analysis. J Assoc Inf Sci Technol.
- 25 2017;68(7):1763–71.
- 26
- 27 32. Zaharie MA, Osoian CL. Peer review motivation frames: A qualitative approach. Eur
- 28 Manag J. 2016;34(1):69–79.
- 29
- 30 33. Tite L, Schroter S. Why do peer reviewers decline to review? A survey. J Epidemiol
- 31 Community Health. 2007;61(1):9–12.
- 32
- 33 34. Willis M. Why do peer reviewers decline to review manuscripts? A study of reviewer
- 34 invitation responses. Learn Publ. 2016;29(1):5–7.
- 35
- 36 35. University of Glasgow. Academic Promotion Criteria Research Scientist Grades 7-9,
- 37 University of Glasgow [Internet]. Available from:
- 38 [https://www.gla.ac.uk/media/media\\_498056\\_en.pdf](https://www.gla.ac.uk/media/media_498056_en.pdf)
- 39
- 40 36. June 12th, communication 2019|Academic, review P, Comments R policy|4. Peer review
- 41 is not just quality control, it is part of the social infrastructure of research [Internet].
- 42 Impact of Social Sciences. 2019 [cited 2019 Jun 28]. Available from:
- 43 [https://blogs.lse.ac.uk/impactofsocialsciences/2019/06/12/peer-review-is-not-just-quality-](https://blogs.lse.ac.uk/impactofsocialsciences/2019/06/12/peer-review-is-not-just-quality-control-it-is-part-of-the-social-infrastructure-of-research/)
- 44 [control-it-is-part-of-the-social-infrastructure-of-research/](https://blogs.lse.ac.uk/impactofsocialsciences/2019/06/12/peer-review-is-not-just-quality-control-it-is-part-of-the-social-infrastructure-of-research/)
- 45
- 46 37. Moher D, Naudet F, Cristea IA, Miedema F, Ioannidis JPA, Goodman SN. Assessing
- 47 scientists for hiring, promotion, and tenure. PLOS Biol. 2018 Mar 29;16(3):e2004089.
- 48
- 49
- 50
- 51
- 52
- 53
- 54
- 55
- 56
- 57
- 58
- 59
- 60

## Topic guide for semi-structured interviews

| Key area of investigation                 | Topics                                                                                                                                                 | Questions and prompts                                                                                                                                                                                                                                                                                                                                                                                                                                                                                                                                                                                                                                                                                                                                                                                                                                                                                                                                                                                                                                                                                                                                                                                                                                                                                                                                                                                                                                                                                                                                                          |
|-------------------------------------------|--------------------------------------------------------------------------------------------------------------------------------------------------------|--------------------------------------------------------------------------------------------------------------------------------------------------------------------------------------------------------------------------------------------------------------------------------------------------------------------------------------------------------------------------------------------------------------------------------------------------------------------------------------------------------------------------------------------------------------------------------------------------------------------------------------------------------------------------------------------------------------------------------------------------------------------------------------------------------------------------------------------------------------------------------------------------------------------------------------------------------------------------------------------------------------------------------------------------------------------------------------------------------------------------------------------------------------------------------------------------------------------------------------------------------------------------------------------------------------------------------------------------------------------------------------------------------------------------------------------------------------------------------------------------------------------------------------------------------------------------------|
| Background information                    | <ul style="list-style-type: none"> <li>- Explore personal background</li> <li>- Level of experience</li> <li>- Roles and tasks as an editor</li> </ul> | <ul style="list-style-type: none"> <li>• Tell me about your journal and the job you have.</li> <li>• How long have you been in this position?</li> <li>• Did you hold any other editorial position before your current position? If yes, what were your responsibilities then?</li> </ul> <p>Prompt: percentage of time devoted to editorial duties (e.g., part time, full time)</p> <ul style="list-style-type: none"> <li>• What are your current responsibilities (roles and tasks)?</li> </ul>                                                                                                                                                                                                                                                                                                                                                                                                                                                                                                                                                                                                                                                                                                                                                                                                                                                                                                                                                                                                                                                                             |
| Journal set-up                            | <ul style="list-style-type: none"> <li>- Explore journal set-up</li> </ul>                                                                             | <ul style="list-style-type: none"> <li>• Tell me about your journal - how does it work?</li> </ul> <p>Prompt: availability of resources (e.g. human and financial resources), relationship with publisher</p> <ul style="list-style-type: none"> <li>• How does the peer review process work in your journal?</li> </ul> <p>Prompt: submission system, peer review model (e.g., single blind etc)</p> <ul style="list-style-type: none"> <li>• What do you do within the process?</li> </ul> <p>Prompt: Interaction with peer reviewers</p>                                                                                                                                                                                                                                                                                                                                                                                                                                                                                                                                                                                                                                                                                                                                                                                                                                                                                                                                                                                                                                    |
| Opinion on peer reviewers roles and tasks | <ul style="list-style-type: none"> <li>- Roles and tasks of peer reviewers</li> <li>- Expectations</li> </ul>                                          | <ul style="list-style-type: none"> <li>• What do you expect from peer reviewers in terms of their roles and tasks?</li> <li>• What about training for peer reviewers?</li> </ul> <p>Prompt: use items from scoping review (roles and task related), attitudes and beliefs (e.g. on training, how they peer review themselves) , organisational expectations</p> <ul style="list-style-type: none"> <li>• How do you let your reviewers know what you expect from them?</li> </ul> <p>Prompt: journal guidelines</p> <ul style="list-style-type: none"> <li>• Can you tell me about a specific situation when you were not satisfied with a review report or with a peer reviewer?</li> <li>• What did you do in that a situation?</li> </ul> <p>Prompt: probe for factors other than being late with a review, or not doing a review once you they have accepted it</p> <ul style="list-style-type: none"> <li>• Can you tell me about a situation when you were exceptionally satisfied with a review or with a peer reviewer?</li> <li>• Were there situations (in regards to the roles and task of reviewers) when you disagreed with the other editors you work with? What about? What happened?</li> <li>• What about other journals, do roles and tasks differ among journals in your field?</li> </ul> <p>Prompt: if yes (i.e. differences exist), then:</p> <ul style="list-style-type: none"> <li>• How does this affect the process?</li> <li>• How does it affect your communication?</li> <li>• How do you negotiate those differences? Does it matter?</li> </ul> |

|                                                                                                                                                                                                                                                                                                                                          |                                                                                              |                                                                                                                                                                                                                                                                                                                                                                                                                                                                                              |
|------------------------------------------------------------------------------------------------------------------------------------------------------------------------------------------------------------------------------------------------------------------------------------------------------------------------------------------|----------------------------------------------------------------------------------------------|----------------------------------------------------------------------------------------------------------------------------------------------------------------------------------------------------------------------------------------------------------------------------------------------------------------------------------------------------------------------------------------------------------------------------------------------------------------------------------------------|
| <p>1<br/>2<br/>3<br/>4<br/>5<br/>6<br/>7<br/>8<br/>9<br/>10<br/>11<br/>12<br/>13<br/>14<br/>15<br/>16</p> <p>Communication between editors, peer reviewers and authors</p>                                                                                                                                                               | <p>- Communication between the three parties</p> <p>- Potential conflicts</p> <p>- Power</p> | <ul style="list-style-type: none"> <li>• Can you describe your experience of the communication process between editors, authors and peer reviews?</li> <li>• How do you communicate with authors and peer reviewers?</li> <li>• Can you give me some specific examples of situations where this communication is challenging?</li> </ul> <p>Prompt:<br/>What are potential conflicts?<br/>When do disagreements arise?<br/>What happens if there is disagreement between peer reviewers?</p> |
| <p>17<br/>18<br/>19<br/>20<br/>21<br/>22<br/>23<br/>24<br/>25<br/>26<br/>27<br/>28<br/>29<br/>30<br/>31<br/>32<br/>33<br/>34<br/>35<br/>36<br/>37<br/>38<br/>39<br/>40<br/>41<br/>42<br/>43<br/>44<br/>45<br/>46<br/>47<br/>48<br/>49<br/>50<br/>51<br/>52<br/>53<br/>54<br/>55<br/>56<br/>57<br/>58<br/>59<br/>60</p> <p>Conclusion</p> | <p>- Snowballing</p> <p>- Documents</p> <p>- Final comments</p>                              | <ul style="list-style-type: none"> <li>• Is there anybody else whom you think I should speak to?</li> <li>• Any articles/documents I can access/should look at?</li> <li>• Any final comments? Is there anything else that you think is important to mention?</li> </ul>                                                                                                                                                                                                                     |

## Actions undertaken to establish trustworthiness of analysis

| Phases of thematic analysis             | Techniques for establishing trustworthiness                                                                                                                                                                                                                                                                                                                                                                                         |
|-----------------------------------------|-------------------------------------------------------------------------------------------------------------------------------------------------------------------------------------------------------------------------------------------------------------------------------------------------------------------------------------------------------------------------------------------------------------------------------------|
| Phase 1:<br>Familiarizing with the data | <b>Prolonged engagement with data</b> (credibility) <ul style="list-style-type: none"> <li>- KG performed multiple readings of all transcripts</li> </ul> <b>Reflexive journaling</b> (confirmability) <ul style="list-style-type: none"> <li>- Documentation of thoughts and potential codes/themes were taken during phase 1 and throughout the entire data analysis</li> </ul>                                                   |
| Phase 2:<br>Generating initial codes    | <b>Member-checking and peer debriefing</b> (credibility) <ul style="list-style-type: none"> <li>- The first six interviews were coded independently by two researchers (KG and DH) leading to the creation of the initial codebook</li> </ul> <b>Audit trail</b> (confirmability) <ul style="list-style-type: none"> <li>- Codebook was updated after every new interview creating an audit trail of the code generation</li> </ul> |
| Phase 3:<br>Searching for themes        | <b>Researcher triangulation</b> (confirmability) <ul style="list-style-type: none"> <li>- Regular team meetings to review findings from different perspectives</li> <li>- Diagramming/drawing to make sense of theme connections</li> </ul>                                                                                                                                                                                         |
| Phase 4:<br>Reviewing themes            | <b>Researcher triangulation</b> (confirmability) <ul style="list-style-type: none"> <li>- Regular team meetings to vet themes and subthemes</li> </ul> <b>Audit trail</b> (confirmability) <ul style="list-style-type: none"> <li>- We returned to raw data to check for referential adequacy</li> </ul>                                                                                                                            |
| Phase 5:<br>Defining and naming themes  | <b>Researcher triangulation</b> (confirmability) <ul style="list-style-type: none"> <li>- Team consensus on themes</li> </ul>                                                                                                                                                                                                                                                                                                       |
| Phase 6:<br>Producing the report        | <b>Thick description</b> (transferability) <ul style="list-style-type: none"> <li>- The methodological approach and analytical choices were described in detail in previously published study protocol</li> <li>- We provide detailed descriptions of study results</li> <li>- Peer debriefing with researchers outside of the core group (IB and DM)</li> </ul>                                                                    |

# Roles

- Proficient experts in their field qualified to peer review
- Dutiful towards scientific community vs volunteers who deserve recognition
- Professionals
- Advisors to the editor

# Tasks

- Organisation and approach to reviewing
- Make general comments
- Assess and address content for each section of the manuscript
- Address ethical aspects

## Consolidated criteria for reporting qualitative studies (COREQ): 32-item checklist

Developed from:

Tong A, Sainsbury P, Craig J. Consolidated criteria for reporting qualitative research (COREQ): a 32-item checklist for interviews and focus groups. *International Journal for Quality in Health Care*. 2007. Volume 19, Number 6: pp. 349 – 357

**YOU MUST PROVIDE A RESPONSE FOR ALL ITEMS. ENTER N/A IF NOT APPLICABLE**

| No. Item                                       | Guide questions/description                                                                                                                              | Reported on Page #                           |
|------------------------------------------------|----------------------------------------------------------------------------------------------------------------------------------------------------------|----------------------------------------------|
| <b>Domain 1: Research team and reflexivity</b> |                                                                                                                                                          |                                              |
| <i>Personal Characteristics</i>                |                                                                                                                                                          |                                              |
| 1. Interviewer/facilitator                     | Which author/s conducted the interview or focus group?                                                                                                   | Page 3                                       |
| 2. Credentials                                 | What were the researcher's credentials?<br>E.g. PhD, MD                                                                                                  | Page 3                                       |
| 3. Occupation                                  | What was their occupation at the time of the study?                                                                                                      | Page 3                                       |
| 4. Gender                                      | Was the researcher male or female?                                                                                                                       | Page 3                                       |
| 5. Experience and training                     | What experience or training did the researcher have?                                                                                                     | Page 3                                       |
| <i>Relationship with participants</i>          |                                                                                                                                                          |                                              |
| 6. Relationship established                    | Was a relationship established prior to study commencement?                                                                                              | Page 3                                       |
| 7. Participant knowledge of the interviewer    | What did the participants know about the researcher? e.g. personal goals, reasons for doing the research                                                 | Page 3                                       |
| 8. Interviewer characteristics                 | What characteristics were reported about the interviewer/facilitator? e.g. Bias, assumptions, reasons and interests in the research topic                | Page 3                                       |
| <b>Domain 2: study design</b>                  |                                                                                                                                                          |                                              |
| <i>Theoretical framework</i>                   |                                                                                                                                                          |                                              |
| 9. Methodological orientation and Theory       | What methodological orientation was stated to underpin the study? e.g. grounded theory, discourse analysis, ethnography, phenomenology, content analysis | Page 2 (previously published study protocol) |
| <i>Participant selection</i>                   |                                                                                                                                                          |                                              |
| 10. Sampling                                   | How were participants selected? e.g. purposive, convenience, consecutive, snowball                                                                       | Page 2                                       |
| 11. Method of approach                         | How were participants approached? e.g. face-to-face, telephone, mail, email                                                                              | Page 2-3                                     |

|                                        |                                                                                                                                 |                                                   |
|----------------------------------------|---------------------------------------------------------------------------------------------------------------------------------|---------------------------------------------------|
| 12. Sample size                        | How many participants were in the study?                                                                                        | Page 2-3, and published study protocol            |
| 13. Non-participation                  | How many people refused to participate or dropped out? Reasons?                                                                 | N/A                                               |
| <i>Setting</i>                         |                                                                                                                                 |                                                   |
| 14. Setting of data collection         | Where was the data collected? e.g. home, clinic, workplace                                                                      | N/A                                               |
| 15. Presence of non-participants       | Was anyone else present besides the participants and researchers?                                                               | N/A                                               |
| 16. Description of sample              | What are the important characteristics of the sample? e.g. demographic data, date                                               | Page 3-4                                          |
| <i>Data collection</i>                 |                                                                                                                                 |                                                   |
| 17. Interview guide                    | Were questions, prompts, guides provided by the authors? Was it pilot tested?                                                   | Page 3, additional file with topic guide provided |
| 18. Repeat interviews                  | Were repeat interviews carried out? If yes, how many?                                                                           | No repeat interviews carried out                  |
| 19. Audio/visual recording             | Did the research use audio or visual recording to collect the data?                                                             | Page 3                                            |
| 20. Field notes                        | Were field notes made during and/or after the interview or focus group?                                                         | Page 3                                            |
| 21. Duration                           | What was the duration of the interviews or focus group?                                                                         | Page 3                                            |
| 22. Data saturation                    | Was data saturation discussed?                                                                                                  | Page 3                                            |
| 23. Transcripts returned               | Were transcripts returned to participants for comment and/or correction?                                                        | N/A                                               |
| <b>Domain 3: analysis and findings</b> |                                                                                                                                 |                                                   |
| <i>Data analysis</i>                   |                                                                                                                                 |                                                   |
| 24. Number of data coders              | How many data coders coded the data?                                                                                            | Page 3                                            |
| 25. Description of the coding tree     | Did authors provide a description of the coding tree?                                                                           | Page 3                                            |
| 26. Derivation of themes               | Were themes identified in advance or derived from the data?                                                                     | Page 2-3                                          |
| 27. Software                           | What software, if applicable, was used to manage the data?                                                                      | Page 3                                            |
| 28. Participant checking               | Did participants provide feedback on the findings?                                                                              | Not performed.                                    |
| <i>Reporting</i>                       |                                                                                                                                 |                                                   |
| 29. Quotations presented               | Were participant quotations presented to illustrate the themes/findings? Was each quotation identified? e.g. participant number | Page 4-10                                         |
| 30. Data and findings consistent       | Was there consistency between the data presented and the findings?                                                              | Page 11-13                                        |
| 31. Clarity of major themes            | Were major themes clearly presented in the findings?                                                                            | Page 4-10                                         |
| 32. Clarity of minor themes            | Is there a description of diverse cases or                                                                                      | Page 4-10                                         |



1  
2  
3  
4  
5  
6  
7  
8  
9  
10  
11  
12  
13  
14  
15  
16  
17  
18  
19  
20  
21  
22  
23  
24  
25  
26  
27  
28  
29  
30  
31  
32  
33  
34  
35  
36  
37  
38  
39  
40  
41  
42  
43  
44  
45  
46  
47  
48  
49  
50  
51  
52  
53  
54  
55  
56  
57  
58  
59  
60

|  |                             |  |
|--|-----------------------------|--|
|  | discussion of minor themes? |  |
|--|-----------------------------|--|

For peer review only
