# Supplementary material for: Journal editors’ perspectives on the roles and tasks of peer reviewers in biomedical journals: a qualitative study
Source: PubMed Central journal article supplement (PMC6886905; doi:10.1136/bmjopen-2019-033421), 2019-11-24
Supplement: bmjopen-2019-033421supp001.pdf [file bmjopen-2019-033421supp001.pdf]

## Topic guide for semi-structured interviews

| Key area of investigation                 | Topics                                                                                                                                                 | Questions and prompts                                                                                                                                                                                                                                                                                                                                                                                                                                                                                                                                                                                                                                                                                                                                                                                                                                                                                                                                                                                                                                                                                                                                                                                                                                                                                                                                                                                                                                                                                                                                                          |
|-------------------------------------------|--------------------------------------------------------------------------------------------------------------------------------------------------------|--------------------------------------------------------------------------------------------------------------------------------------------------------------------------------------------------------------------------------------------------------------------------------------------------------------------------------------------------------------------------------------------------------------------------------------------------------------------------------------------------------------------------------------------------------------------------------------------------------------------------------------------------------------------------------------------------------------------------------------------------------------------------------------------------------------------------------------------------------------------------------------------------------------------------------------------------------------------------------------------------------------------------------------------------------------------------------------------------------------------------------------------------------------------------------------------------------------------------------------------------------------------------------------------------------------------------------------------------------------------------------------------------------------------------------------------------------------------------------------------------------------------------------------------------------------------------------|
| Background information                    | <ul style="list-style-type: none"> <li>- Explore personal background</li> <li>- Level of experience</li> <li>- Roles and tasks as an editor</li> </ul> | <ul style="list-style-type: none"> <li>• Tell me about your journal and the job you have.</li> <li>• How long have you been in this position?</li> <li>• Did you hold any other editorial position before your current position? If yes, what were your responsibilities then?</li> </ul> <p>Prompt: percentage of time devoted to editorial duties (e.g., part time, full time)</p> <ul style="list-style-type: none"> <li>• What are your current responsibilities (roles and tasks)?</li> </ul>                                                                                                                                                                                                                                                                                                                                                                                                                                                                                                                                                                                                                                                                                                                                                                                                                                                                                                                                                                                                                                                                             |
| Journal set-up                            | <ul style="list-style-type: none"> <li>- Explore journal set-up</li> </ul>                                                                             | <ul style="list-style-type: none"> <li>• Tell me about your journal - how does it work?</li> </ul> <p>Prompt: availability of resources (e.g. human and financial resources), relationship with publisher</p> <ul style="list-style-type: none"> <li>• How does the peer review process work in your journal?</li> </ul> <p>Prompt: submission system, peer review model (e.g., single blind etc)</p> <ul style="list-style-type: none"> <li>• What do you do within the process?</li> </ul> <p>Prompt: Interaction with peer reviewers</p>                                                                                                                                                                                                                                                                                                                                                                                                                                                                                                                                                                                                                                                                                                                                                                                                                                                                                                                                                                                                                                    |
| Opinion on peer reviewers roles and tasks | <ul style="list-style-type: none"> <li>- Roles and tasks of peer reviewers</li> <li>- Expectations</li> </ul>                                          | <ul style="list-style-type: none"> <li>• What do you expect from peer reviewers in terms of their roles and tasks?</li> <li>• What about training for peer reviewers?</li> </ul> <p>Prompt: use items from scoping review (roles and task related), attitudes and beliefs (e.g. on training, how they peer review themselves) , organisational expectations</p> <ul style="list-style-type: none"> <li>• How do you let your reviewers know what you expect from them?</li> </ul> <p>Prompt: journal guidelines</p> <ul style="list-style-type: none"> <li>• Can you tell me about a specific situation when you were not satisfied with a review report or with a peer reviewer?</li> <li>• What did you do in that a situation?</li> </ul> <p>Prompt: probe for factors other than being late with a review, or not doing a review once you they have accepted it</p> <ul style="list-style-type: none"> <li>• Can you tell me about a situation when you were exceptionally satisfied with a review or with a peer reviewer?</li> <li>• Were there situations (in regards to the roles and task of reviewers) when you disagreed with the other editors you work with? What about? What happened?</li> <li>• What about other journals, do roles and tasks differ among journals in your field?</li> </ul> <p>Prompt: if yes (i.e. differences exist), then:</p> <ul style="list-style-type: none"> <li>• How does this affect the process?</li> <li>• How does it affect your communication?</li> <li>• How do you negotiate those differences? Does it matter?</li> </ul> |

|                                                           |                                                                                                                                             |                                                                                                                                                                                                                                                                                                                                                                                                                                                                                                                               |
|-----------------------------------------------------------|---------------------------------------------------------------------------------------------------------------------------------------------|-------------------------------------------------------------------------------------------------------------------------------------------------------------------------------------------------------------------------------------------------------------------------------------------------------------------------------------------------------------------------------------------------------------------------------------------------------------------------------------------------------------------------------|
| Communication between editors, peer reviewers and authors | <ul style="list-style-type: none"> <li>- Communication between the three parties</li> <li>- Potential conflicts</li> <li>- Power</li> </ul> | <ul style="list-style-type: none"> <li>• Can you describe your experience of the communication process between editors, authors and peer reviews?</li> <li>• How do you communicate with authors and peer reviewers?</li> <li>• Can you give me some specific examples of situations where this communication is challenging?</li> </ul> <p>Prompt:<br/>           What are potential conflicts?<br/>           When do disagreements arise?<br/>           What happens if there is disagreement between peer reviewers?</p> |
| Conclusion                                                | <ul style="list-style-type: none"> <li>- Snowballing</li> <li>- Documents</li> <li>- Final comments</li> </ul>                              | <ul style="list-style-type: none"> <li>• Is there anybody else whom you think I should speak to?</li> <li>• Any articles/documents I can access/should look at?</li> <li>• Any final comments? Is there anything else that you think is important to mention?</li> </ul>                                                                                                                                                                                                                                                      |
