# Supplementary material for: Journal editors’ perspectives on the roles and tasks of peer reviewers in biomedical journals: a qualitative study
Source: PubMed Central journal article supplement (PMC6886905; doi:10.1136/bmjopen-2019-033421), 2019-11-24
Supplement: bmjopen-2019-033421supp002.pdf [file bmjopen-2019-033421supp002.pdf]

## Actions undertaken to establish trustworthiness of analysis

| Phases of thematic analysis             | Techniques for establishing trustworthiness                                                                                                                                                                                                                                                                                                                                                                                         |
|-----------------------------------------|-------------------------------------------------------------------------------------------------------------------------------------------------------------------------------------------------------------------------------------------------------------------------------------------------------------------------------------------------------------------------------------------------------------------------------------|
| Phase 1:<br>Familiarizing with the data | <b>Prolonged engagement with data</b> (credibility) <ul style="list-style-type: none"> <li>- KG performed multiple readings of all transcripts</li> </ul> <b>Reflexive journaling</b> (confirmability) <ul style="list-style-type: none"> <li>- Documentation of thoughts and potential codes/themes were taken during phase 1 and throughout the entire data analysis</li> </ul>                                                   |
| Phase 2:<br>Generating initial codes    | <b>Member-checking and peer debriefing</b> (credibility) <ul style="list-style-type: none"> <li>- The first six interviews were coded independently by two researchers (KG and DH) leading to the creation of the initial codebook</li> </ul> <b>Audit trail</b> (confirmability) <ul style="list-style-type: none"> <li>- Codebook was updated after every new interview creating an audit trail of the code generation</li> </ul> |
| Phase 3:<br>Searching for themes        | <b>Researcher triangulation</b> (confirmability) <ul style="list-style-type: none"> <li>- Regular team meetings to review findings from different perspectives</li> <li>- Diagramming/drawing to make sense of theme connections</li> </ul>                                                                                                                                                                                         |
| Phase 4:<br>Reviewing themes            | <b>Researcher triangulation</b> (confirmability) <ul style="list-style-type: none"> <li>- Regular team meetings to vet themes and subthemes</li> </ul> <b>Audit trail</b> (confirmability) <ul style="list-style-type: none"> <li>- We returned to raw data to check for referential adequacy</li> </ul>                                                                                                                            |
| Phase 5:<br>Defining and naming themes  | <b>Researcher triangulation</b> (confirmability) <ul style="list-style-type: none"> <li>- Team consensus on themes</li> </ul>                                                                                                                                                                                                                                                                                                       |
| Phase 6:<br>Producing the report        | <b>Thick description</b> (transferability) <ul style="list-style-type: none"> <li>- The methodological approach and analytical choices were described in detail in previously published study protocol</li> <li>- We provide detailed descriptions of study results</li> <li>- Peer debriefing with researchers outside of the core group (IB and DM)</li> </ul>                                                                    |
