# Supplementary material for: Journal editors’ perspectives on the roles and tasks of peer reviewers in biomedical journals: a qualitative study
Source: PubMed Central journal article supplement (PMC6886905; doi:10.1136/bmjopen-2019-033421), 2019-11-24
Supplement: bmjopen-2019-033421supp003.pdf [file bmjopen-2019-033421supp003.pdf]

# Roles

- Proficient experts in their field qualified to peer review
- Dutiful towards scientific community vs volunteers who deserve recognition
- Professionals
- Advisors to the editor

# Tasks

- Organisation and approach to reviewing
- Make general comments
- Assess and address content for each section of the manuscript
- Address ethical aspects

## Additional file 3

### Roles and Tasks of peer reviewers
